1 **Protein phosphatase V ensures timely cell cycle remodeling during the mid-blastula**  
2 **transition in *Drosophila***

3

4

5 Boyang Liu (1), Hung-wei Sung (1), Ingo Gregor (2), H.-Arno Müller (3), Jörg Großhans (1)

6

7 (1) Institut für Entwicklungsbiochemie, Universitätsmedizin, Universität Göttingen, Germany

8 (2) Drittes Physikalisches Institut, Universität Göttingen, Germany

9 (3) College of Life Sciences, University of Dundee, United Kingdom; Institut für Biologie,  
10 Universität Kassel, Germany

11

12 Running title: MBT cell cycle remodeling by PpV

13

14 **Abstract (149 words)**

15 Cell cycle remodeling from fast nuclear cycles to a generic cell cycle mode is a major feature of  
16 the mid-blastula transition (MBT) in *Drosophila*. Remodeling occurs when Twine/Cdc25 falls  
17 below a critical threshold. Timing is based on Twine destabilization induced by zygotic  
18 transcription. It is conceivable that appropriate starting levels are also important for timely  
19 reaching the threshold. Mechanisms for controlling Twine levels at the onset of MBT are  
20 unknown. Here we identify a function of the protein phosphatase V in this mechanism. Twine  
21 was increased in *PpV* mutants, whereas the decay rate was comparable to wildtype. *PpV*  
22 mutants frequently underwent an extra nuclear division. We detected PpV-dependent  
23 phosphosites in Twine. Phosphosite mutants contain higher Twine levels and frequently  
24 underwent an extra nuclear division, comparable to *PpV* mutants. Our data support a model  
25 that the cell cycle remodeling is controlled by induced destabilization and PpV-dependent  
26 control of Twine levels.

27

28 **Key words:**

29 Blastoderm, Twine/Cdc25, cell cycle, *Drosophila*, mid-blastula transition, protein phosphatase

## 30 Introduction

31

32 A change in the mode of the cell cycle from a fast nuclear cycles with no gap phases and no  
33 cytokinesis to a generic mode with a long gap phase and slow replication is a characteristic  
34 feature of the mid-blastula transition (MBT) in early embryogenesis (Farrell2014, Blythe2015a,  
35 Liu2017). This remodeling of the cell cycle is linked to changes in a number of cellular  
36 processes, including DNA replication checkpoint, epigenetic markers, onset of zygotic gene  
37 expression, degradation of maternal RNAs and morphological changes (Blythe2015a,  
38 Harrison2015, Laver2015). In *Drosophila* embryos, the cell cycle remodeling occurs after the  
39 mitosis of nuclear cycle 13 (Foe1993). The activation of zygotic transcription triggers the cell  
40 cycle switch in that the DNA checkpoint is activated (Sung2013, Blythe2015b) and few zygotic  
41 genes encoding mitotic inhibitors are expressed (Grosshans2000, Grosshans2003,  
42 Gawlinski2007).

43

44 At the center of the embryonic cell cycle switch is a positive regulator of Cdk1, the phosphatase  
45 Twine/Cdc25 (Edgar1996), which is stable during the 13 fast cycles but is destabilized by  
46 zygotic factors like Tribbles (Trbl) after mitosis 13 (Di Talia2013, Farrell2013). Twine levels  
47 normally fall below the critical threshold for entry into mitosis in interphase 14, which is  
48 achieved by a drop in half life by a factor of 4 from about 20 min to 5 min (Di Talia2013). Since  
49 there is significant protein synthesis, the decay time of Twine, including translation and  
50 degradation, is longer than its half life. However, important for when the levels of Twine reach  
51 the threshold is not only the rate of decay. It is conceivable that an increase in the starting  
52 levels leads to a delay in reaching the threshold. Mechanism for controlling Twine protein  
53 expression at the onset of MBT are unknown.

54

55 The *Drosophila Protein phosphatase V (PpV)* encodes the homologue of the catalytic subunit of  
56 human PP-6 (Mann1993, Bastians1996). PP-6 has been implicated in mitosis and meiosis  
57 (Stefansson2007, Chen2007, Hu2015, Ertych2016), DNA repair (Zhong2011), inflammation  
58 (Yan2015), *C. elegans* cortical contractility (Afshar2010) and mouse early embryogenesis  
59 (Ogoh2016). In addition to these physiological functions, PP-6 mutations have been found to be  
60 associated with melanoma tumors (Hodis2012, Krauthammer2012, Hammond2013). PP-6 is an

61 inhibitory phosphatase of oncogene AuroraA kinase (Zeng2010, Ertych2016). Quantitative  
62 phosphoproteomics identified further potential PP-6 substrates (Rusin2015), whose  
63 physiological relevance has remained undefined.

64

65 Here we characterize the function of *PpV* in cell cycle remodeling during MBT in *Drosophila*  
66 embryos. We isolated and characterized a *PpV* null mutant allele. We reveal a function in  
67 controlling the switch in cell cycle mode. Loss of *PpV* frequently led to an additional nuclear  
68 division and increased the variance of Twine protein levels. Our results indicate that *PpV*  
69 controls low initial levels of Twine, allowing a timely drop of protein levels below the threshold  
70 for entry into mitosis.

71

72

## 73 Results

74

### 75 *PpV* mutant embryos frequently undergo an extra nuclear division cycle

76 We screened a collection of mutations with early embryonic phenotypes (Luschnig2004,  
77 Vogt2006) for cell cycle defects (Fig. 1A). Embryos from females with germline clones of the X9  
78 mutation (in the following designated as *PpV*[X9] embryos) developed apparently normally until  
79 gastrulation but underwent frequently one extra round of nuclear division as shown by time  
80 lapse imaging with bright field microscopy and with embryos with fluorescently labelled histone  
81 (Fig. 1B, Movie 1). The extra division often involved only part of the embryo resulting in regions  
82 with higher nuclear density (Fig. 1B). The penetrance of the extra division (including divisions  
83 involving only a part of the embryos) was in the range of one third to one half of the embryos.  
84 The timing of the early cell cycles was comparable to wild type embryos (Fig. 1C). Cycle 13 was  
85 slightly prolonged in *PpV*[X9] embryos with a normal number of nuclear divisions and similar to  
86 the length of cycle 14 in *PpV*[X9] embryos with an extra nuclear division. Many eggs from  
87 *PpV*[X9] germ line clones (about 50%, N>100) did not develop, indicating a function in egg  
88 activation, meiosis or fertilization.

89

90 We mapped the lethality and the cell cycle phenotype by meiotic recombination and  
91 complementation with duplication and deficiency chromosomes to the 5F region (Supplemental

92 material Fig. S1). Sequencing of the genes in the mapped region revealed a nonsense mutation  
93 in the seventh codon in the *PpV* gene encoding the *Drosophila* homologue of the catalytic  
94 subunit of protein phosphatase 6 (Fig. 2A, 2B). This mutation is responsible for the phenotype,  
95 since a genomic construct rescued the lethality and the cell cycle phenotype of *PpV*[X9] (Fig.  
96 2A). *PpV*[X9] is likely to be a protein null allele as a band was detected by western blot with  
97 extracts from wild type and rescued but not *PpV* mutant embryos (Fig. 2C). We did not detect a  
98 band in extracts from staged embryos (Fig. 2C), indicating a lack of significant zygotic  
99 expression. Consistently, we did not observe a zygotic rescue leading to an ameliorated  
100 phenotype or larval hatching in half of the embryos.

101

102 Due to cross reactivity, the antiserum was not suitable for immunostaining. Employing a  
103 transgene with a GFP inserted at the N-terminus of PpV, which rescued lethality and the  
104 embryonic cell cycle phenotype, we could specifically detect the distribution of PpV protein (Fig.  
105 2D). We detected a spatially and temporally uniform expression of GFP-PpV in early embryos.  
106 Close observation revealed slightly lower nuclear levels. We did not observe obvious  
107 differences in fluorescence among embryos in pre-gastrulation stages and embryos in  
108 interphase and mitosis, suggesting that expression levels of PpV protein did not change during  
109 the early embryonic cell cycles (Fig. 2D).

110

### 111 **Twine protein levels are increased and longer persisting in *PpV* mutants**

112 Cell cycle remodeling at MBT is induced by destabilization of Twine/Cdc25 (Di Talia2013,  
113 Farrell2013). We investigated genetic interactions of *PpV* and *twine*. We found that *twine* is a  
114 dominant suppressor of *PpV*, since we observed a few hatching larvae from *PpV* germ line  
115 clones that were heterozygous for *twine* (5%, N>1000). This suggests that *PpV* may act in an  
116 antagonistic manner on *twine*. Total *twine* RNA as measured by qPCR was similar in wild type  
117 and *PpV* embryos (1: 0.94). We compared the developmental profile of Twine protein in wild  
118 type and *PpV* embryos by immunostaining of fixed embryos for Twine. We found that Twine  
119 staining tentatively persisted longer in *PpV* embryos than wild type embryos as staged by  
120 morphological markers (Fig. 3). However, comparison of Twine levels between wild type and  
121 mutant embryos is problematic, since Twine levels were highly dynamic in cycle 14 and showed  
122 high variance especially in the *PpV* mutants. For reliable and precise quantification of the rapid



123 and variant dynamics, a noninvasive quantitative method is needed that is applicable to single  
124 embryos during MBT.

125

126 We applied fluctuation analysis employing embryos expressing Twine-GFP protein in order to  
127 reveal the temporal profile in individual embryos (Fig. 4A–C). As the fluctuations in the  
128 fluorescence traces are dependent on the GFP concentration, the number of molecules per  
129 optical volume can be calculated (Chen2002, Digman2008, Fig. 4C). We validated the method  
130 in embryos expressing one or two copies of nuclear localization signal GFP (nls-GFP) driven by  
131 the ubiquitin promoter. Western blotting with extracts from these embryos demonstrated that  
132 protein levels corresponded to gene copy number (Fig. 4D). Fluctuation analysis with embryos  
133 in early cycle 14 revealed an increase from  $c(1 \times \text{GFP}) = 102.3 \pm 17.3$  to  $c(2 \times \text{GFP}) = 213.7 \pm 49.1$ ,  
134 and thus a two-fold higher absolute concentration of nls-GFP in embryos with two transgenes  
135 as compared to embryos with one nls-GFP transgene (Fig. 4E).

136

137 Having validated the method, we recorded the concentration profile of Twine-GFP fluorescence  
138 during the course of interphase 14 (Fig. 5B). The Twine-GFP transgene is fully functional in  
139 *twine* mutants as female sterility was rescued (Fig. 5A). From the time courses of Twine-GFP  
140 concentration in single embryos (Fig. 5C), we calculated two parameters for each embryo  
141 assuming an exponential function: the decay time (which includes protein production and  
142 degradation and is larger than the half life of the protein) and the initial particle number, which  
143 corresponds to the concentration at the onset of interphase 14 (Fig. 5C, 5D). In embryos with  
144 one copy of Twine-GFP in addition to the two endogenous copies of *twine*, we calculated  
145 values with little variation around the mean (12.9%, Tab. 2), indicating that our method is robust  
146 (Fig. 5E, 5F). In contrast, a statistically significant change of the initial particle number from  
147  $38.5 \pm 5.0$  in wild type to  $56.7 \pm 19.5$  in *PpV* mutants was calculated (Tab. 2). More striking than  
148 the change of the mean value is the strongly increased variance. The standard deviation more  
149 than doubled from 13% in wild type to 34% in *PpV* mutants (Fig. 5E, Tab. 2). Many of the *PpV*  
150 mutants have an initial particle number of approximately 80 that is double of the wild type  
151 number while others are in the range of wild type. The decay time of about 10 min remained  
152 unchanged in *PpV* mutant embryos (Fig. 5F). Visa versa, we found a statistically significant  
153 change in the decay time to about 13.5 min in *trbl* embryos (Fig. 5F, Tab. 2) but an unchanged

154 initial particle number (Fig. 5E). These data are consistent with the previous report on the role  
155 of *trbl* in Twine destabilization (Farrell2013). These measurements indicate that PpV controls  
156 the expression levels of Twine protein and maintains a low embryo to embryo variation in pre-  
157 MBT. Complementary to PpV, zygotic *Trbl* is involved in the induced destabilization of Twine  
158 during MBT by enhancing the decay rate.

159

### 160 **Twine is hyperphosphorylated in *PpV* mutants**

161 To assess a potential control of Twine protein stability by phosphorylation, we analyzed Twine  
162 protein by mass spectrometry. We isolated Twine-GFP with GFP-binder from staged wild type  
163 and *PpV* mutant embryos (Fig. 6A). The isolated amounts of Twine-GFP protein were visible  
164 with Coomassie blue staining (Fig. 6B). Isolated and digested bands were analyzed for their  
165 peptide sequences and for phosphorylated residues. In wild type and mutant embryos, we  
166 achieved coverage of 59.4% and 70%, respectively, and we detected peptides 1.8 fold more  
167 frequently in wild type than in mutants (Fig. 6C, Suppl. data Tab. S1). Two dual phosphorylation  
168 sites were found in both wild type and *PpV* embryos: Thr203+Ser205 and Thr394+Ser396 (Fig.  
169 6C, Tab. 1). Importantly, an additional three sites were identified in *PpV* mutants: Ser41, at  
170 least one residue in the region between 59 and 67, and a clustered site close to the C-terminus,  
171 Ser405 and Ser412 (Fig. 6C, Tab. 1). These sites are evolutionary not conserved (Suppl. Data  
172 Fig. S2). The mass spectrometric analysis indicates that Twine is phosphorylated at additional  
173 sites in *PpV* mutants and suggests that PpV may act on Twine either directly or indirectly via  
174 other protein phosphatase or kinase.

175

176 To test the relevance of the identified residues, we generated Twine-GFP constructs and  
177 corresponding transgenes, in which these residues were mutated (Fig. 6D). The transgenes  
178 were crossed into *twine* mutants to test for complementation as a sign for functionality of the  
179 mutated constructs. We generated phosphosite (Twine-GFP-8×Ala) and phosphomimetic  
180 (Twine-GFP-8×Asp) mutants in the context of a genomic rescue construct (Fig. 6D). Both  
181 mutated transgenes complemented the *twine* female sterility similar to the wild type transgene.  
182 However, the phosphomimetic mutant showed a dominant lethality with two copies. This  
183 dominant lethal phenotype indicates that Twine-GFP-8xAsp is acquired for new activities, such  
184 as new substrates. We did not further analyze the phosphomimetic mutant, as data

185 interpretation would be questionable.

186

187 We measured Twine protein levels and their decay by fluorescence fluctuation analysis in  
188 embryos containing no endogenous Twine but the transgenic Twine-GFP. The phosphosite  
189 mutant contained a strongly increased amount of initial Twine levels (Fig. 6E, Tab. 2). We  
190 detected this increase in embryos with one copy of the transgene as well as in embryos with  
191 two copies. The decay rate was slightly lower in embryos with the phosphosite mutation than  
192 with the wild type allele (Fig. 6E, Tab. 2). Consistent with the higher Twine levels we observed a  
193 cell cycle phenotype. Amazingly, embryos with one or two copies of Twine-GFP-8×Ala  
194 frequently underwent an additional nuclear division (Fig. 6F). In summary, we detected  
195 developmentally relevant phosphorylation sites in Twine by our mass-spectrometric analysis.  
196 Mutation of the PpV-dependent phosphorylation sites leads to higher protein expression and  
197 importantly a corresponding extra nuclear division in embryos comparable to *PpV* mutants. We  
198 conclude that PpV controls Twine phosphorylation state, ensures low expression levels and  
199 prompt decay of Twine, and thus timely remodeling of the cell cycle.

200

### 201 *PpV* and *trbl* act in parallel

202 The differences in the dynamics of Twine-GFP suggest that PpV acts in a different manner on  
203 Twine than Trbl. To test this notion, we analyzed genetic interactions between *PpV* and *trbl*.  
204 *Trbl* has been implicated in cell cycle remodeling due to its zygotic expression and its ability to  
205 pause the nuclear division cycle (Grosshans2000, Seher2000) and its role in degradation of  
206 Twine/Cdc25 (Farrell2013). *Trbl* homozygous animals have reduced viability, fertile flies, and  
207 *trbl* embryos from homozygous females undergo a normal number of nuclear divisions. In  
208 contrast, *trbl* females with *PpV* germ line clones did not produce any eggs. The ovaries of these  
209 females displayed multiple defects including egg chambers with an increased number of nurse  
210 cells (Data not shown). As both mutations are null alleles, we conclude that *PpV* and *trbl* act in  
211 parallel pathways in oogenesis, because the double mutant phenotype is stronger than the  
212 phenotypes of the single mutants.

213

214 In order to assess genetic interactions in embryos during MBT, we had to circumvent the  
215 oogenesis defect. We depleted *trbl* by injection of dsRNA into early embryos as described

216 previously (Farrell2013). Following *trbl* RNAi injection in *PpV* mutant embryos we observed a  
217 slightly increased proportion of *PpV* embryos with an extra nuclear division cycle (Fig. 7B).  
218 Next, we tested whether the ability of *trbl* to induce a precocious cell cycle pause depended on  
219 *PpV*. Following injection of *trbl* mRNA into wild type as well as *PpV* embryos, we observed a  
220 precocious cell cycle pause as indicated by the lower nuclear density, larger nuclei at the  
221 injection site (Fig. 7A, 7B). These experiments show that *trbl* can precociously pause the cell  
222 cycle even in the absence of *PpV*. In summary, these experiments indicate that *PpV* and *trbl* act  
223 in separate pathways controlling entry into mitosis.

224

### 225 **The delayed cell cycle remodeling in *PpV* mutants does not depend on AuroraA**

226 Next we investigated whether *PpV* controls Twine phosphorylation indirectly via AuroraA  
227 (AurA), which controls progression of mitotic events (Glover1995). It is assumed that PP-6  
228 dependent dephosphorylation suppresses activation of AurA during mitosis in human cells  
229 (Zeng2010). AurA may also be a *PpV* substrate in *Drosophila* embryos. We observed an  
230 impaired chromosome segregation at low frequency in *PpV* mutants (NC10–13, 3% of the  
231 nuclei (N>100), three embryos) (Fig. 8A, Movie 2). Chromosomes did not separate and fused  
232 with chromosomes from neighboring spindles, although the arrangement of the centrosomes  
233 with single centrosomes at spindle poles appeared normal (Fig. 8A). In addition, we often  
234 observed delayed chromosome separation in telophase (Fig. 8B). In addition, we detected an  
235 additional band in an AurA western blot with extracts from *PpV* embryos in comparison to wild  
236 type extracts (Fig. 8C), which may correspond to a hyperphosphorylated AurA form. These  
237 observations are consistent with the antagonistic relationship of PP-6 and AurA in human cells.

238

239 It is conceivable that phosphorylated and thus activated AurA contributes to progression of  
240 nuclear division cycles. According to this model, AurA would have a higher activity in *PpV*  
241 mutants and thus trigger an extra nuclear division. A prediction from this model is that the extra  
242 division in *PpV* mutants depends on AurA. This prediction can be tested with double mutants of  
243 *PpV* and *aurA*. Embryos from hypomorphic *aurA* females develop until the blastoderm stage  
244 and are characterized by severe and asynchronous mitotic defects (Glover1995, Fig. 8D),  
245 which prevented counting the number of nuclear divisions in *aurA* mutants and *PpV aurA*  
246 double mutants. To circumvent this problem, we employed the chemical inhibitor MLN8054,

247 which has been demonstrated to be specific for AurA (Manfredi2007). To validate the activity of  
248 this compound in *Drosophila* embryos, we injected MLN8054 into wild type embryos expressing  
249 Histone 2Av-RFP and recorded movies. Injected embryos frequently showed defects in  
250 chromosome segregation in anaphase and telophase of syncytial cycles depending on the  
251 concentration of the inhibitor (Fig. 8E). This phenotype is consistent with the *aurA* mutant  
252 phenotype (Glover1995, Fig. 8D). The dose response curve indicates an effective concentration  
253 at about 20  $\mu$ M in the injection solution (Fig. 8F). Injection into wild type embryos did not  
254 change the number of nuclear divisions on top of chromosomal segregation defects (Fig. 8G).  
255 All embryos went through 13 divisions. Injection into *PpV* mutant embryos resulted in a mixed  
256 phenotype with 13 or 14 nuclear divisions comparable to water injected *PpV* mutant embryos  
257 (Fig. 8G). We conclude that AurA activity is not required for the extra nuclear division in *PpV*  
258 mutant embryos. These data indicate that AurA does not link PpV to Twine for cell cycle  
259 remodeling during MBT.

260

## 261 Discussion

262

263 Here we defined a novel function of PpV/PP-6 in cell cycle remodeling during MBT in  
264 *Drosophila*. At the center of this remodeling is the degradation of Twine/Cdc25 protein (Di  
265 Talia2013, Farrell2013). During the onset of cycle 14 and in response to MBT, the half life of  
266 Twine protein decreases from 20 min to 5 min (Di Talia2013). The biochemical signature of the  
267 degradation signal and the mechanism for the reduced half life remain elusive except for that  
268 Trbl and zygotic gene expression are involved. Here we revealed a mechanism that acts in  
269 addition to induced destabilization of Twine. The time, when Twine level falls below the critical  
270 threshold for entry into mitosis is determined by two parameters: (1) the decay time/half life and  
271 (2) initial levels. We propose a model, in which Trbl and other unknown zygotic factors  
272 controlled by the activated zygotic genome are involved in the induced destabilization during  
273 MBT, whereas maternal PpV controls the pre-MBT levels of Twine (Fig. 9A).

274

275 Twine/Cdc25 protein is expressed in high levels during pre-MBT stage in many *PpV* mutant  
276 embryos indicating that PpV ensures low protein levels in wild type embryos. Beside the higher  
277 expression levels, it is remarkable that the embryo to embryo variation depends on PpV. In *PpV*

278 mutants, we observed a wide variation of Twine. This variation is not due to limitations of our  
279 measurement technique, since measurements for nls-GFP and Twine-GFP in wild type  
280 embryos are robust with little variation. Our measurements indicate that PpV suppresses  
281 embryo to embryo variation by keeping Twine levels low. This would be consistent with a  
282 safeguarding function of PpV, which narrows the variation to a ground level. Such a mechanism  
283 could also explain the 30%–50% penetrance of *PpV* embryonic cell cycle phenotype.

284  
285 PpV acts in parallel to other mechanisms ensuring the robust and timely switch in the cell cycle  
286 mode. In contrast to PpV, these are triggered by the onset of zygotic transcription either directly  
287 such as the mitotic inhibitor Frühstart (Frs) that targets the hydrophobic patch of the Cyclin-  
288 Cdk1 complex (Gawlinski2007) and Trbl that is involved in destabilization of Twine in MBT  
289 (Farrell2013), or indirectly such as the checkpoint kinase Grapes/Chk1 (Sung2013,  
290 Blythe2015b) (Fig. 9B).

291  
292 Twine/Cdc25 may be a direct substrate, with PpV hydrolyzing the phosphates at the identified  
293 positions. Alternatively, PpV may dephosphorylate and thereby inhibit a protein kinase for the  
294 identified positions on Twine/Cdc25. As AuroraA is a target of PpV, PpV may act indirectly on  
295 Twine/Cdc25, in that PpV inactivates AuroraA, which then cannot phosphorylate Twine/Cdc25.  
296 Mitotic Cdc25b phosphorylation by AuroraA in cultured human tumor cells has previously been  
297 reported (Dutertre2004). We do not favor this model, because firstly two of the three PpV  
298 dependent phosphorylation sites on Twine do not match the Aurora lenient consensus motif  
299 [KR].[ST][^P] (Sardon2010). Secondly, AuroraA acts and is activated during mitosis, whereas  
300 control of Twine protein levels is an interphase process. Thirdly, and most importantly inhibition  
301 of AuroraA by chemical inhibitors in *PpV* mutants did not suppress the extra mitosis, indicating  
302 that the entry into an extra cycle does not depend on hyperactive AuroraA.

303  
304 The cell cycle control during MBT is a remarkable robust process with almost no variation in  
305 wild type embryos. Such a robustness requires save guarding mechanisms against natural  
306 variation of protein content and egg size, for example, especially when thresholds and gradients  
307 (temporal decay of Twine) are involved. Multiple mechanisms, including control of Twine levels  
308 by PpV, have been revealed that control the remodeling from fast nuclear cycles to an

309 embryonic cell cycle mode. Future experiments will define the mechanism how PpV controls  
310 Twine protein levels and many redundant pathways are needed for the robust cell cycle switch  
311 during MBT.

312

313

314



## 315 **Methods and materials**

316

### 317 **Genetics**

318 Fly stocks were obtained from the Bloomington Drosophila Stock Center, if not otherwise  
319 noted. Following fly strains and mutations were used: *trb*[EP1119], *twine*[HB5]. Following  
320 transgenes were used: Twine-GFP (integrated at the landing site attP2/68A4, S. Blythe, S. Di  
321 Talia and E. Wieschaus), Histone2Av-GFP/RFP. Genomic transgenes (PpV[+], GFP-PpV[+])  
322 were generated according to standard protocols by PhiC31 integrase-mediated site-specific  
323 insertions in the landing site ZH-86Fb (Bischof2007). The germ line clone phenotype on the X9  
324 chromosome was mapped to the X:4–6 region and separated from another lethal mutation in  
325 the X:13–16 region by meiotic recombination with marker chromosomes. The lethality was  
326 mapped by complementation with duplications and deficiencies to 5F3–4 region delimited by  
327 the proximal breakpoint of Df(1)ED6829 and distal breakpoint of Dp(1;3)DC156. The  
328 duplication Dp(1;3)DC155 rescued lethality and the germ line clone phenotype. The genes in  
329 this region, i. e. *swaPsi*, *swa*, *Marf* and *PpV*, were sequenced on the X9 chromosome in  
330 comparison to the X238 chromosome, which was isolated in the same mutagenesis  
331 background.

332

### 333 **Molecular genetics, cloning, constructs**

334 For the *PpV* rescue construct, a 2679bp EcoRI fragment from BAC clone 18C-18 (BACPAC  
335 Resources Center) was isolated and cloned into the pattB vector (Bischof2007). For GFP-PpV  
336 **the 5' terminal 444 bp (a HindIII/EcoRI-BspM1 fragment)** were replaced by a corresponding  
337 1229 bp fragment with codon optimized GFP and a linker inserted at the start codon, which  
338 was synthesized by Eurofins Genomics and cloned into the pattB vector. CS2-tribbles plasmid  
339 template was linearized by XhoI and transcribed by SP6 Transcription Kit (Ambion). dsRNAs  
340 were produced by T7 RNA polymerase (Ambion), NTPs, RNase inhibitor (Thermo Fisher) and  
341 Pyrophosphatase (Thermo Fisher), using CS2-tribbles as template and dsRNA primers BL10  
342 (GTAATACGACTCACTATAGGGCGATCAGCGCACAGCCTAGTCA) and BL11  
343 (GTAATACGACTCACTATAGGGCGATGGCCATAGATGGTGCTCC). The Twine-EGFP  
344 transgene was synthesizing as a 3.6 kb complementing genomic fragment (Alphey1992) with  
345 an in-frame insertion of a Drosophila codon optimized EGFP at the C-terminus including a

346 linker sequence (S. Blythe, S. Di Talia and E. Wieschaus). The constructs of mutated Twine  
347 phosphosites were synthesized by Eurofins Genomics and cloned into the KpnI/BamHI  
348 fragment of Twine-EGFP-pBABR plasmid.

349

### 350 RNA isolation, quantitative PCR

351 Quantitative PCR and data analysis were carried out according to the protocols of SYBR  
352 Green Real-Time PCR Master Mixes and qPCR system software (Thermo Fisher Scientific).  
353 cDNA template was synthesized by reverse transcription of *Drosophila* total RNA, which was  
354 isolated by using TRIzol total RNA isolation protocol (Invitrogen). The following primer pairs  
355 were used: *twine* qPCR primers BL16 (GAGTTCCTTGGCGGACACAT) and BL17  
356 (CAGGATAGTCCAGTGCCGGAT); *GAPDH* qPCR primers MP37F  
357 (CACCAGTTCATTCCCAACTT) and MP37R (CTTGCCTTCAGGTGACGC).

358

### 359 Antibodies, Immunisation

360 The *PpV* coding sequence was cloned into an expression vector with a C-terminal His-tag. The  
361 PpV-His protein was purified under denaturing conditions (Trenzyme, Konstanz). Rabbits were  
362 immunized with the purified denatured protein (BioGenes, Berlin). In western blots the serum  
363 detected a band that was not present in extracts from *PpV*[X9] embryos. In whole mount  
364 staining no difference between wild type and *PpV*[X9] embryos was observed. Following  
365 antibodies were used: AuroraA (Giet2002), Feo (rabbit, Verni2004), LaminDm0 (mouse,  
366 T47/1/1, Risau1981),  $\gamma$ -tubulin (GTU-88, Sigma), GFP-booster (Chromotek), Dia (rabbit, guinea  
367 pig, Grosshans2005, Wenzl2010), Slam (rabbit, guinea pig, Acharya2014), Twine (rat, Di  
368 Talia2013).

369

### 370 Immunostaining

371 Formaldehyde or heat fixed embryos were rinsed thrice in PBT, and blocked in PBT with 5%  
372 BSA at 4°C overnight. The primary antibodies were added in the respective dilutions in 0.1%  
373 BSA with PBT and embryos were incubated 2 h with constant rotation at room temperature.  
374 Then the embryos were rinsed thrice and washed four times 15 min with PBT. Secondary  
375 antibodies were added in PBT and embryos were incubated for 2 h. Embryos were rinsed  
376 thrice and washed four times 15 min in PBT again. Embryos were then stained with DNA dye,

377 rinsed thrice in PBT, washed in PBT for 5 min and mounted in Aquapolymount (Polysciences).

378

### 379 **Embryo microinjection**

380 Embryos were dechorionated with 50% Klorix bleach for 90 s, dried in a desiccation chamber  
381 for 5 to 10 min, then covered by halocarbon oil. Glass capillaries with internal filament were  
382 pulled as needles. For transgenesis, DNA was injected at 0.1  $\mu\text{g}/\mu\text{l}$  posteriorly and prior to pole  
383 cell formation. Capped mRNAs were injected at a concentration of 800 ng/ $\mu\text{l}$ . dsRNA was  
384 injected at concentration of 12 mg/ml (Farrell2013). MLN8054 Aurora Kinase inhibitor (Sellack  
385 chemicals, Manfredi2007) was injected at a concentration of 20  $\mu\text{M}$  diluted in water. We  
386 estimate the injection volume to be roughly 1–5% of the embryo volume.

387

### 388 **Western blot**

389 Proteins were separated by SDS polyacrylamide gel electrophoresis and transferred to  
390 nitrocellulose membrane by semi-dry or wet transfer and stained with Ponceau S for loading  
391 control. Following blocking with 5% milk powder in PBT, the filters were incubated with primary  
392 antibodies in 0.5% BSA in PBT overnight at 4°C. After washing (3× rinsed, 4× 10 min in PBT)  
393 and incubation with secondary antibodies (800CW, 680CW, Donkey anti-guinea  
394 pig/mouse/rabbit IgG) for 1 h at room temperature, the blots were imaged with an Odyssey CLx  
395 Infrared imaging system. 16-bit images were processed by Photoshop and FIJI/ImageJ.  
396 Collected embryos (N=10–20) were pooled, dissolved in 1× Laemmli buffer and boiled at 95°C  
397 for 10 min. To facilitate homogenization, the lysates were gently triturated.

398

### 399 **Microscopy**

400 Images of fixed and stained samples were recorded with a confocal microscope (Zeiss  
401 LSM780). The settings and objectives (25×/water, 40×/oil and 63×/water) were based on  
402 optimal imaging conditions and each channel was recorded separately. For life imaging,  
403 embryos were dechorionated with 50% hypochloride bleach for 90 s, aligned on a piece of  
404 apple-juice agar, transferred to a coated cover slip and covered with halocarbon oil. Live  
405 movies with differential interference contrast (DIC) optics were recorded with a light intensity of  
406 2.5–3.0 V, an exposure time of 80–100 ms and a frame interval of 0.5–1 min. Fluorescent  
407 movies were recorded at an inverted spinning disc microscope (Zeiss, CSU-X1) with 30–50%

408 laser intensity, 100 ms exposure time and a frame rate of 1 image per 0.5 to 1 min.

409

### 410 Fluctuation analysis

411 Following female genotype were utilized: wild type 1×: Twine-GFP/+, *PpV* 1×: *PpV*[X9]/*ovoD*;  
412 Twine-GFP/+, *trbl* 1×: X9/*ovoD*; *trbl*, Twine-GFP/*trbl*. Phosphosite mutant 1×: *twine*/*twine*;  
413 Twine-GFP/TM3, *twine*/*twine*; Twine-GFP-8×Ala/TM3. Phosphosite mutant 2×: *twine*/*twine*;  
414 Twine-GFP/Twine-GFP, *twine*/*twine*; Twine-GFP-8×Ala/Twine-GFP-8×Ala. Fluctuation traces  
415 were recorded with a 63× oil immersion objective (Planapochromat, NA 1.4/oil) and a GaAsP  
416 detector on a confocal microscope (Zeiss LSM780) in fluorescence correlation spectrometry  
417 (FCS) mode. Onset of interphase 14 was defined as T=0. The data were analyzed as  
418 previously reported (Chen 2002, Digman 2008). Briefly, the intensity traces were analyzed  
419 using the number and brightness analysis. Time average  $\langle i \rangle$  and variance  $\sigma^2$  were computed  
420 for each trace. From these values, we obtained the average brightness per molecule as  $\langle e \rangle =$   
421  $(\sigma^2 / \langle i \rangle) - 1$  and the average number of molecules within the focal volume as  $\langle n \rangle = \langle i \rangle / \langle e \rangle$ .  
422 The statistical significance (p value) of differences between the measured distributions were  
423 **calculated by Student's t-test**. Usually 5 traces of each 10 s length were used for calculation of  
424 one data point N(t). For control measurements with nls-GFP four data points were averaged.  
425 For the time dependent decay of Twine-GFP at least five data point were used for fitting in an  
426 exponential curve by linear regression analysis. Determination coefficients were in the range of  
427  $>0.97$ .

428

### 429 Mass-spec/phospho-sites

430 Dechorionated pre-syncytial and syncytial (0–1.5 h) Twine-GFP/Twine-GFP embryos and  
431 embryos from *PpV* germline clones with Twine-GFP (maternal genotype *PpV*[X9] Frt18  
432 hsFlp/*ovoD* Frt18; Twine-GFP/+) were collected in large batches and snap frozen in liquid  
433 nitrogen. Each 10000 embryos were lysed with a dounce homogenizer in 1 ml lysis and  
434 washing buffer (50 mM Tris/HCl [pH 7.4], 500 mM NaCl, 1 mM DTT, 0.5 mM EDTA, 0.5%  
435 Tween 20, 1% Phosphatase Inhibitor Cocktail 3 (Sigma-Aldrich), 1 Tablet/50 ml Protease  
436 Inhibitor Cocktail (Roche)). The preparatory experiment was in the scale of about 50000  
437 embryos. The embryonic lysate was centrifuged twice at 14,000 rpm at 4°C for 15 min, and the  
438 supernatant was transferred into new Eppendorf tube. GFP-TrapA agarose beads (20  $\mu$ l) were

439 washed thrice with lysis and washing buffer and added to 1 ml of cleared embryonic lysate.  
440 After rotating on a wheel for 1 hour at 4°C, spinning at 800 rpm for 2 min, and washing Twine-  
441 GFP thrice with lysis and washing buffer, protein was eluted from the beads in Laemmli buffer.  
442 Samples were run on SDS-PAGE 4–12% gradient 4–12% MOPS buffered system and bands  
443 excised and processed. Band slices were digested with trypsin over night at 30°C and the  
444 peptide extracted the next day. Samples were resuspended in 1% formic acid and a 15 µl  
445 Aliquots of each sample were run either before or after phosphopeptide enrichment.  
446 Phosphopeptides were enriched using Ti 4+ IMAC (ReSyn Biosciences) on an UltiMate 3000  
447 RSLC nano system (Thermo Scientific) coupled to a LTQ OrbiTrap Velos Pro (Thermo  
448 Scientific). Peptides were initially trapped on an Acclaim PepMap 100 (C18, 100 µm × 2 cm)  
449 and then separated on an EasySpray PepMap RSLC C18 column (75 µm × 50 cm) (Thermo  
450 Scientific) over a 120 min linear gradient. The data was analyzed by Proteome Discoverer 1.4  
451 (Thermo Scientific) using Mascot 2.4 (Matrix Science) as the search engine.

452

453

#### 454 **Acknowledgements**

455 We are grateful to H. Bastians, S. Blythe, G. Bucher, S. Di Talia, M. Gatti, S. Luschnig, H.  
456 Saumweber and E. Wieschhaus for materials or discussions. We are grateful to M. Kojic, E.  
457 Öztürk, S. Spangenberg, N. Vogt for help during preliminary experimental work. We thank R.  
458 Webster, D. Lamont and K. Beattie of the School of Life Sciences, University of Dundee, U.K.  
459 for sample processing and mass spectrometry. We acknowledge service support from the  
460 Developmental Studies Hybridoma Bank created by NICHD of the NIH/USA and maintained by  
461 the University of Iowa, the Bloomington Drosophila Stock Center (supported by NIH  
462 P40OD018537), the Drosophila Genomics and Genetic Resources, Kyoto, the BACPAC  
463 **Resources Center at Children’s Hospital Oakland and the Genomic Resource Center at Indiana**  
464 University (supported by NIH 2P40OD010949-10A1). BL was in part supported by a fellowship  
465 from the China Scholarship Council. HwS was in part supported by a predoctoral fellowship of  
466 the German Academic Exchange Service (DAAD). This work was in part supported by the  
467 Göttingen Centre for Molecular Biology (funds for equipment repair) and the Deutsche  
468 Forschungsgemeinschaft (DFG GR1945/3-1, SFB937/TP10 and equipment grant  
469 INST1525/16-1 FUGG).

470

## 471 Author contributions

472 BL conducted the experiments and analyzed the data, HwS mapped and cloned the X9  
473 mutation, IG analyzed the fluctuation data, HAM conducted the MS analysis, JG conceived the  
474 project, conducted the initial phenotypic analysis and wrote the manuscript.

475

## 476 Conflict of interest

477 The authors have no conflict of interest.

478

479

## 480 References

481

- 482 Acharya S, Laupsien P, Wenzl C, Yan S & Grosshans J (2014) Function and dynamics of slam  
483 in furrow formation in early *Drosophila* embryo. *Dev. Biol.* **386**: 371–384
- 484 Afshar K, Werner ME, Tse YC, Glotzer M & Gönczy P (2010) Regulation of cortical contractility  
485 and spindle positioning by the protein phosphatase 6 PPH-6 in one-cell stage *C. elegans*  
486 embryos. *Development* **137**: 237–247
- 487 Alphey L, Jimenez J, White-Cooper H, Dawson I, Nurse P & Glover DM (1992) twine, a cdc25  
488 homolog that functions in the male and female germline of *Drosophila*. *Cell* **69**: 977–988
- 489 Bastians H & Ponstingl H (1996) The novel human protein serine/threonine phosphatase 6 is a  
490 functional homologue of budding yeast Sit4p and fission yeast ppe1, which are involved in  
491 cell cycle regulation. *J. Cell Sci.* **109 ( Pt 12)**: 2865–2874
- 492 Bischof J, Maeda RK, Hediger M, Karch F, Basler K (2007) An optimized transgenesis system  
493 for *Drosophila* using germ-line-specific  $\Phi$ C31 integrases. *Proc. Natl. Acad. Sci. U.S.A.* **104**:  
494 3312-3317
- 495 Blythe SA & Wieschaus EF (2015a) Coordinating Cell Cycle Remodeling with Transcriptional  
496 Activation at the *Drosophila* MBT. *Curr. Top. Dev. Biol.* **113**: 113–148
- 497 Blythe SA & Wieschaus EF (2015b) Zygotic Genome Activation Triggers the DNA Replication  
498 Checkpoint at the Midblastula Transition. *Cell* **160**: 1169–1181
- 499 Chen F, Archambault V, Kar A, Lio P, D'Avino PP, Sinka R, Lilley K, Laue ED, Deak P,  
500 Capalbo L & Glover DM (2007) Multiple protein phosphatases are required for mitosis in



- 501 *Drosophila*. *Current Biology* **17**: 293–303
- 502 Chen Y, Müller JD, Ruan Q & Gratton E (2002) Molecular brightness characterization of EGFP  
503 in vivo by fluorescence fluctuation spectroscopy. *Biophys. J.* **82**: 133–144
- 504 Di Talia S, She R, Blythe SA, Lu X, Zhang QF & Wieschaus EF (2013) Posttranslational  
505 control of Cdc25 degradation terminates *Drosophila*'s early cell-cycle program. *Curr. Biol.*  
506 **23**: 127–132
- 507 Digman MA, Dalal R, Horwitz AF & Gratton E (2008) Mapping the number of molecules and  
508 brightness in the laser scanning microscope. *Biophys. J.* **94**: 2320–2332
- 509 Dutertre S, Cazales M, Quaranta M, Froment C, Trabut V, Dozier C, Mirey G, Bouché J-P,  
510 Theis-Febvre N, Schmitt E, Monsarrat B, Prigent C & Ducommun B (2004) Phosphorylation  
511 of CDC25B by Aurora-A at the centrosome contributes to the G2-M transition. *J. Cell Sci.*  
512 **117**: 2523–2531
- 513 Edgar BA & Datar SA (1996) Zygotic degradation of two maternal Cdc25 mRNAs terminates  
514 *Drosophila*'s early cell cycle program. *Genes Dev.* **10**: 1966–1977
- 515 Ertych N, Stolz A, Valerius O, Braus GH & Bastians H (2016) CHK2-BRCA1 tumor-suppressor  
516 axis restrains oncogenic Aurora-A kinase to ensure proper mitotic microtubule assembly.  
517 *Proc. Natl. Acad. Sci. U.S.A.* **113**: 1817–1822
- 518 Farrell JA & O'Farrell PH (2013) Mechanism and regulation of Cdc25/Twine protein destruction  
519 in embryonic cell-cycle remodeling. *Curr. Biol.* **23**: 118–126
- 520 Farrell JA & O'Farrell PH (2014) From egg to gastrula: how the cell cycle is remodeled during  
521 the *Drosophila* mid-blastula transition. *Annu. Rev. Genet.* **48**: 269–294
- 522 Foe VE, Odell GM & Edgar BA (1993) Mitosis and Morphogenesis in the *Drosophila* Embryo:  
523 Point and Counterpoint. In *The Development of Drosophila melanogaster*, Bate M & Arias  
524 AM (eds) Cold Spring Harbor Laboratory Press
- 525 **Gawliński P, Nikolay R, Goursot C, Lawo S, Chaurasia B, Herz H-M**, Kussler-Schneider Y,  
526 Ruppert T, Mayer M & Grosshans J (2007) The *Drosophila* mitotic inhibitor Frühstart  
527 specifically binds to the hydrophobic patch of cyclins. *EMBO Rep.* **8**: 490–496
- 528 Giet R, McLean D, Descamps S, Lee MJ, Raff JW, Prigent C & Glover DM (2002) *Drosophila*  
529 Aurora A kinase is required to localize D-TACC to centrosomes and to regulate astral  
530 microtubules. *J. Cell Biol.* **156**: 437–451
- 531 Glover DM, Leibowitz MH, McLean DA & Parry H (1995) Mutations in aurora prevent



- 532 centrosome separation leading to the formation of monopolar spindles. *Cell* **81**: 95–105
- 533 Grosshans J & Wieschaus E (2000) A genetic link between morphogenesis and cell division  
534 during formation of the ventral furrow in *Drosophila*. *Cell* **101**: 523–531
- 535 Grosshans J, Müller HAJ & Wieschaus E (2003) Control of cleavage cycles in *Drosophila*  
536 embryos by frühstart. *Dev. Cell* **5**: 285–294
- 537 Grosshans J, Wenzl C, Herz HM, Bartoszewski S, Schnorrer F, Vogt N, Schwarz H, Müller HA  
538 (2005) RhoGEF2 and the formin Dia control the formation of the furrow canal by directed  
539 actin assembly during *Drosophila* cellularisation. *Development* **132**: 1009–1020
- 540 Hammond D, Zeng K, Espert A, Bastos RN, Baron RD, Gruneberg U & Barr FA (2013)  
541 Melanoma-associated mutations in protein phosphatase 6 cause chromosome instability  
542 and DNA damage owing to dysregulated Aurora-A. *J. Cell Sci.* **126**: 3429–3440
- 543 Harrison MM & Eisen MB (2015) Transcriptional Activation of the Zygotic Genome in  
544 *Drosophila*. *Curr. Top. Dev. Biol.* **113**: 85–112
- 545 Hodis E, Watson IR, Kryukov GV, Arold ST, Imielinski M, Theurillat J-P, Nickerson E, Auclair  
546 D, Li L, Place C, Dicara D, Ramos AH, Lawrence MS, Cibulskis K, Sivachenko A, Voet D,  
547 Saksena G, Stransky N, Onofrio RC, Winckler W, et al (2012) A landscape of driver  
548 mutations in melanoma. *Cell* **150**: 251–263
- 549 Hu M-W, Wang Z-B, Teng Y, Jiang Z-Z, Ma X-S, Hou N, Cheng X, Schatten H, Xu X, Yang X &  
550 Sun Q-Y (2015) Loss of protein phosphatase 6 in oocytes causes failure of meiosis II exit  
551 and impaired female fertility. *J. Cell Sci.* **128**: 3769–3780
- 552 Krauthammer M, Kong Y, Ha BH, Evans P, Bacchiocchi A, McCusker JP, Cheng E, Davis MJ,  
553 Goh G, Choi M, Ariyan S, Narayan D, Dutton-Regester K, Capatana A, Holman EC,  
554 Bosenberg M, Sznol M, Kluger HM, Brash DE, Stern DF, et al (2012) Exome sequencing  
555 identifies recurrent somatic RAC1 mutations in melanoma. *Nat. Genet.* **44**: 1006–1014
- 556 Laver JD, Marsolais AJ, Smibert CA & Lipshitz HD (2015) Regulation and function of maternal  
557 gene products during the maternal-to-zygotic transition in *Drosophila*. *Curr. Top. Dev. Biol.*  
558 **113**: 43–84
- 559 Luschig S, Moussian B, Krauss J, Desjeux I, Perkovic J & Nüsslein-Volhard C (2004) An F1  
560 genetic screen for maternal-effect mutations affecting embryonic pattern formation in  
561 *Drosophila melanogaster*. *Genetics* **167**: 325–342
- 562 Liu B & Grosshans J (2017) Link of zygotic genome activation and cell cycle control. *Methods*

- 563 *Mol. Biol.* **1605**: 11–30
- 564 Manfredi MG, Ecsedy JA, Meetze KA, Balani SK, Burenkova O, Chen W, Galvin KM, Hoar KM,  
565 Huck JJ, LeRoy PJ, Ray ET, Sells TB, Stringer B, Stroud SG, Vos TJ, Weatherhead GS,  
566 Wysong DR, Zhang M, Bolen JB & Claiborne CF (2007) Antitumor activity of MLN8054, an  
567 orally active small-molecule inhibitor of Aurora A kinase. *Proc. Natl. Acad. Sci. U.S.A.* **104**:  
568 4106–4111
- 569 Mann DJ, Dombradi V & Cohen PTW (1993) Drosophila protein phosphatase. **12**: 4833–4842
- 570 Ogoh H, Tanuma N, Matsui Y, Hayakawa N, Inagaki A, Sumiyoshi M, Momoi Y, Kishimoto A,  
571 Suzuki M, Sasaki N, Ohuchi T, Nomura M, Teruya Y, Yasuda K, Watanabe T & Shima H  
572 (2016) The protein phosphatase 6 catalytic subunit (Ppp6c) is indispensable for proper post-  
573 implantation embryogenesis. *Mech. Dev.* **139**: 1–9
- 574 Risau W, Saumweber H & Symmons P (1981) Monoclonal antibodies against a nuclear  
575 membrane protein of Drosophila. Localization by indirect immunofluorescence and detection  
576 of antigen using a new protein blotting procedure. *Exp. Cell Res.* **133**: 47–54
- 577 Rusin SF, Schlosser KA, Adamo ME & Kettenbach AN (2015) Quantitative phosphoproteomics  
578 reveals new roles for the protein phosphatase PP6 in mitotic cells. *Sci Signal* **8**: rs12–rs12
- 579 Sardon T, Pache RA, Stein A, Molina H, Vernos I & Aloy P (2010) Uncovering new substrates  
580 for Aurora A kinase. *EMBO Rep.* **11**: 977–984
- 581 Seher TC & Leptin M (2000) Tribbles, a cell-cycle brake that coordinates proliferation and  
582 morphogenesis during Drosophila gastrulation. *Current Biology* **10**: 623–629
- 583 Stefansson B & Brautigan DL (2007) Protein phosphatase PP6 N terminal domain restricts G1  
584 to S phase progression in human cancer cells. *Cell Cycle* **6**: 1386–1392
- 585 Sung H-W, Spangenberg S, Vogt N & Grosshans J (2013) Number of nuclear divisions in the  
586 Drosophila blastoderm controlled by onset of zygotic transcription. *Curr. Biol.* **23**: 133–138
- 587 Verni F, Somma MP, Gunsalus KC, Bonaccorsi S, Belloni G, Goldberg ML & Gatti M (2004)  
588 Feo, the Drosophila homolog of PRC1, is required for central-spindle formation and  
589 cytokinesis. *Curr Biol* **14**: 1569–1575
- 590 Vogt N, Koch I, Schwarz H, Schnorrer F & Nüsslein-Volhard C (2006) The gammaTuRC  
591 components Grip75 and Grip128 have an essential microtubule-anchoring function in the  
592 Drosophila germline. *Development* **133**: 3963–3972
- 593 Wenzl C, Yan S, Laupsien P & Grosshans J (2010) Localization of RhoGEF2 during

594 *Drosophila* cellularization is developmentally controlled by slam. *Mech. Dev.* **127**: 371–384  
595 Yan S, Xu Z, Lou F, Zhang L, Ke F, Bai J, Liu Z, Liu J, Wang H, Zhu H, Sun Y, Cai W, Gao Y,  
596 Su B, Li Q, Yang X, Yu J, Lai Y, Yu X-Z, Zheng Y, et al (2015) NF- $\kappa$ B-induced microRNA-31  
597 promotes epidermal hyperplasia by repressing protein phosphatase 6 in psoriasis. *Nat*  
598 *Commun* **6**: 7652  
599 Zeng K, Bastos RN, Barr FA & Gruneberg U (2010) Protein phosphatase 6 regulates mitotic  
600 spindle formation by controlling the T-loop phosphorylation state of Aurora A bound to its  
601 activator TPX2. *J. Cell Biol.* **191**: 1315–1332  
602 Zhong J, Liao J, Liu X, Wang P, Liu J, Hou W, Zhu B, Yao L, Wang J, Li J, Stark JM, Xie Y &  
603 Xu X (2011) Protein phosphatase PP6 is required for homology-directed repair of DNA  
604 double-strand breaks. *Cell Cycle* **10**: 1411–1419  
605

606 **Figure legends**

607

608 **Figure 1: PpV mutants frequently undergo 14 nuclear divisions.** (A) Scheme for the cell  
609 cycle remodeling during MBT. (B) Images from time lapse recordings of wild type embryos and  
610 embryos from *PpV*[X9] germ line clones expressing Histone2Av-RFP and their (C)  
611 quantification for cell cycle lengths. *PpV*[X9] embryos were grouped in ones with normal cell  
612 cycle number (13 divisions) and ones with at least a partial extra cycle (14 divisions). Bars  
613 indicate mean values; associated lines indicate standard error of the mean. Scale bar 50  $\mu$ m.

614

615 **Figure 2: Identification of a *PpV*[X9] mutation.** (A) Map of the *PpV* locus. The X9 mutation  
616 leading to a stop codon at position 7 is indicated (W7stop). (B) Sequence traces of DNA  
617 amplified from heterozygous *PpV*[X9]/FM7 and in comparison X238/FM7 with a related genetic  
618 background. The double peak in the X9 trace reveals a non-sense mutation in codon 7. (C)  
619 Western blot with extracts (0–4 h and as indicated) of wild type embryos and embryos from  
620 germ line clones of *PpV*[X9] and *PpV*[X9] ; PpV[+] crossed with wild type males. Loading  
621 control with  $\alpha$ -Tubulin (Tub). (D) Fixed embryos with and without a genomic rescue construct  
622 GFP-PpV[+] were stained for GFP and DAPI. Scale bar 50  $\mu$ m.

623

624 **Figure 3: PpV modulates Twine protein expression.** Fixed wild type embryos and embryos  
625 from germ line clones of *PpV*[X9] stained for Twine (white), Slam (red) and DNA (blue). Sagittal  
626 sections with Slam staining and nuclear morphology allows approximate staging. NC: nuclear  
627 cycle.

628

629 **Figure 4: Fluctuation analysis for absolute concentration dynamics.** (A) Principle of  
630 fluctuation analysis. Passing through the focal volume leads to changes in the fluorescence  
631 signal. The frequency of these changes dependent on the concentration. (B) Fluctuation trace  
632 of a measurement. (C) Time average and variance are computed from the fluctuations trace,  
633 which allows calculation of average molecular brightness and average number of molecules  
634 within the focal volume. (D) Western blot with extracts of the embryos (0–3 h) with 0 $\times$ , 1 $\times$ , 2 $\times$   
635 copies of an nls-GFP transgene. Quantification by densitometry (N=3). (E) Particle number per  
636 focal volume as determined by fluctuation analysis of GFP fluorescence. Mean, bold line;

637 standard deviation, dashed line.

638

639 **Figure 5: Expression profile of Twine-GFP (A)** Scheme of Twine-GFP genomic rescue  
640 construct. *twine* open reading frame (ORF) is indicated in orange. Linker sequence (Stuffer) is  
641 indicated in blue box and EGFP is in green box. Untranslated regions (UTR) are indicated in  
642 grey box. 3614 bp genomic region is depicted in grey line. **(B)** Experimental scheme. Five 10 s  
643 measurements are recorded for each time point (every 3 min). Multiple time points in interphase  
644 14/15 are recorded for each embryo. **(C)** Images from a recording. **(D)** Representative time  
645 courses for a wild type and mutant embryo. Exponential fitting provides two parameters for  
646 each embryo: initial particle number ( $N_0$ ) and the decay time ( $t$ ). **(E, F)** Distribution of calculated  
647 initial particle number and decay time for wild type embryos, embryos from *PpV[X9]* germ line  
648 clones, and maternal and zygotic homozygous *trbl* embryos, all of which are with one copy of  
649 Twine-GFP. Mean, bold line; standard deviation, dashed line. The numbers indicate the  
650 statistical significance ( $p$  value) for the difference between two distributions.

651

652 **Figure 6: Identification of PpV dependent phosphorylation sites in Twine. (A)** Twine-GFP  
653 was isolated with GFP-binder bound to beads from extracts of staged (0–1.5 h) wild type  
654 embryos or embryos from *PpV[X9]* germ line clones. Western blot with GFP and Dia antibodies.  
655 **(B)** Image of Coomassie blue stained SDS polyacrylamide gel. White boxes indicate the area  
656 that was analyzed by mass-spectrometry. **(C)** Schematic diagram showing the position of Twine  
657 peptides covered in the analysis and the identified phosphorylation sites. Italic types indicate  
658 ambiguous phosphosites. Coverage in wild type and *PpV[X9]* are shown in green and red,  
659 respectively. **(D)** Schematic diagram showing the transgenic Twine-GFP construct with  
660 phosphosites and phosphomimetic mutations. Eight PpV-dependent residues are shown in the  
661 box of Twine-GFP-WT. Phosphosites mutant Twine-GFP-8×Ala indicates the replacement of  
662 the eight phosphorylation residues to alanine/A. Phosphomimetic mutant Twine-GFP-8×Asp  
663 indicates the replacement of the eight phosphorylation residues to aspartic acid/D. **(E)**  
664 Distribution of calculated initial particle number and decay time for embryos with one or two  
665 copies of wild type Twine-GFP and Twine-GFP-8×Ala, all of which are in *twine* mutant  
666 background. Mean, bold line; standard deviation, dashed line. The numbers indicate the  
667 statistical significance ( $p$  value) for the difference between two distributions. **(F)** Frequency of

668 additional nuclear division in the embryos of wild type Twine-GFP and Twine-GFP-8×Ala.

669

670 **Figure 7: Functional interactions of *PpV* and *trbl*.** Wild type embryos and embryos from  
671 germ line clones of *PpV*[X9] expressing Histone 2Av-RFP were injected with water, *trbl* mRNA,  
672 *trbl* dsRNA (RNAi) from the posterior pole (indicated by yellow arrow head). **(A)** Images from  
673 time lapse recordings of injected embryos. The number of nuclear cycle (NC) is indicated. Scale  
674 bar 50  $\mu$ m. **(B)** Movies of injected embryos were scored for the number of nuclear divisions.  
675 Partial NC15 was scored as >14 NC, incomplete NC13 was <14 NC.

676

677 **Figure 8: Relation of *PpV* and *AuroraA*.** **(A)** Fixed embryos from *PpV*[X9] germ line clones  
678 were stained for centrosomes ( $\gamma$ -Tubulin, red), nuclear lamina (LaminDm0, green) and DNA  
679 (DAPI, blue). As a mitotic wave passed over the embryo, multiple mitotic stages were covered  
680 in a single embryo. Arrows in yellow point to mis-segregating nuclei. Scale bar 10  $\mu$ m. **(B)** Fixed  
681 wild type embryo and embryo from *PpV*[X9] germ line clones stained nuclear lamina  
682 (LaminDm0, red), mid body (Feo, green) and DNA (DAPI, blue). The arrow in yellow points to  
683 delayed chromosome separation in telophase. **(C)** Western blot of wild type and *PpV*[X9]  
684 extracts with AurA and  $\alpha$ -Tubulin antibodies. \* indicates an additional band in the *PpV* lane. **(D)**  
685 Image from fixed embryos from hemizygous *aurA* females stained for mitotic nuclei (p-histone3,  
686 red) and DNA (blue). Arrow in yellow points to nucleus with missegregated DNA. Scale bar 20  
687  $\mu$ m. **(E)** Images from time lapse recording of wild type embryos expressing histon2Av-RFP  
688 injected with AuroraA inhibitor MLN8054 (20  $\mu$ M). Scale bar 10  $\mu$ m. Arrows in yellow point to  
689 missegregating spindles. **(F)** Dose dependence of mitotic phenotype following MLN8054  
690 injection. **(G)** Movies of injected embryos were scored for the number of nuclear divisions.  
691 Partial NC15 was scored as >14 NC, incomplete NC13 was <14 NC.

692

693 **Figure 9: *PpV* function during MBT cell cycle control.** **(A)** Schematic temporal profile of  
694 Twine/Cdc25 in wild type and *PpV* mutant embryos (red). *PpV* controls pre-MBT levels of  
695 Twine, whereas *Trbl* and other zygotic factors control the destabilization of Twine during MBT.  
696 **(B)** Cell cycle control during MBT. Activation of the zygotic genome leads to expression of the  
697 zygotic genes (*frs*, *trbl*) and DNA replication stress, which activates the DNA checkpoint. *PpV*  
698 constitutes a forth negative element in control Twine/Cdc25 and Cyclin-Cdk1.

699

700 **Table 1: Analysis of phosphorylation sites by mass spectrometry.**

Wildtype

| Peptides                | Position      | M/Z       | Mr (expt) | Mr(calc)  | Ppm   | Ion score | Expect   |
|-------------------------|---------------|-----------|-----------|-----------|-------|-----------|----------|
| K.SWQCGEGGDSGIGGGSR.G   | S396          | 902.3405  | 1802.6665 | 1802.668  | -0.83 | 46        | 4.40E-05 |
| K.TKSWQCGEGGDSGIGGGSR.G | T394,<br>S396 | 1016.9122 | 2031.8099 | 2031.8106 | -0.34 | 68        | 4.30E-07 |
| K.TLSMNDAEIMR.A         | S205          | 696.7799  | 1391.5453 | 1391.5462 | -0.66 | 32        | 0.00094  |
| K.TLSMNDAEIMR.A         | T203,<br>S205 | 696.7805  | 1391.5464 | 1391.5462 | 0.13  | 31        | 0.004    |

701

X9 mutant

| Peptides                | Position                   | M/Z       | Mr expt (Da) | Mr calc (Da) | Ppm   | Ion score | Expect   |
|-------------------------|----------------------------|-----------|--------------|--------------|-------|-----------|----------|
| K.SWQCGEGGDSGIGGGSR.G   | S412                       | 902.3414  | 1802.6682    | 1802.668     | 0.12  | 47        | 8.50E-05 |
| R.KTLSMNDAEIMR.A        | S205                       | 744.833   | 1487.6515    | 1487.6513    | 0.11  | 62        | 3.70E-06 |
| K.SWQCGEGGDSGIGGGSR.G   | S405                       | 902.3408  | 1802.6671    | 1802.668     | -0.49 | 41        | 0.00014  |
| R.RKSAVQETPLQWMLK.R     | S41                        | 632.3252  | 1893.9538    | 1893.9536    | 0.11  | 27        | 0.0032   |
| R.KTLSMNDAEIMR.A        | T203, S205                 | 752.8309  | 1503.6473    | 1503.6462    | 0.72  | 33        | 0.00078  |
| K.TKSWQCGEGGDSGIGGGSR.G | T394, S396                 | 1016.9127 | 2031.8109    | 2031.8106    | 0.14  | 29        | 0.0073   |
| HIPASTTVLSPITELSQNMNGAR | S59, T60, T61,<br>S64, T67 |           | 2532.2043    | 2532.2043    | 0.42  |           |          |

702

703 Table legend:

704 Results from Mascot data analysis of mass spectrometry (ms/ms) spectra. Peptide sequences are depicted of the Twine/Cdc25  
 705 as predict from fragmentation spectra. Predicted phosphorylation sites are marked in red (bold colors for unambiguous  
 706 annotations). Although peptides were identified independently in many cases only highest scoring peptides are included.  
 707 Observed mass/charge (M/Z) values indicate the result of the measurement and the calculated relative molecular weight (Mr)  
 708 from the M/Z is indicated as experimental (expt) Mr in Dalton (Da). Mr calc depicts the calculated relative molecular weight  
 709 in Dalton (Da) as calculated from the expected Mr from the database. Ppm indicates the error value between Mr expt and Mr  
 710 calc and the ion score indicates the number of spectral ions matching the annotated fragments in the database. The  
 711 expectation value is a statistical representation of the ion score expressed as p-value.

712

713

714

715



716 **Table 2: Initial particle number and decay time measured by fluctuation analysis.**

| Maternal genotype                                   | No. of embryos | Initial particle number<br>Mean ± standard deviation | Decay time (100s)<br>Mean ± standard deviation |
|-----------------------------------------------------|----------------|------------------------------------------------------|------------------------------------------------|
| Twine-GFP/+                                         | 10             | 38.5 ± 5.0 (13%)                                     | 571.7 ± 95.6 (17%)                             |
| <i>PpV</i> ; Twine-GFP/+ (1)                        | 17             | 56.7 ± 19.5 (34%)                                    | 640.1 ± 213.7 (33%)                            |
| <i>tribbles</i> , Twine-GFP/ <i>tribbles</i><br>(2) | 10             | 38.9 ± 11.2 (29%)                                    | 809.2 ± 256.1 (32%)                            |

717

| Genotype                         | No. of embryos | Initial particle number<br>Mean ± standard deviation | Decay time (100s)<br>Mean ± standard deviation |
|----------------------------------|----------------|------------------------------------------------------|------------------------------------------------|
| <i>twine</i> ; Twine-GFP-WT/TM3  | 8              | 26.3 ± 4.7 (18%)                                     | 799.9 ± 131.9 (16%)                            |
| <i>twine</i> ; Twine-GFP-WT      | 7              | 59.7 ± 8.7 (15%)                                     | 736.0 ± 221.4 (30%)                            |
| <i>twine</i> ; Twine-GFP-Ala/TM3 | 8              | 56.6 ± 16.2 (29%)                                    | 601.9 ± 87.8 (15%)                             |
| <i>twine</i> ; Twine-GFP-Ala     | 8              | 99.9 ± 18.6 (19%)                                    | 544.2 ± 173.2 (32%)                            |

718 (1) Females with *PpV* germline clones: *PpV*[X9] *Frt18* *hsFlp* / *ovoD Frt18* ; Twine-GFP / +

719 (2) Females with this genotype were crossed to *tribbles/tribbles* males

720

721 **Supplemental data**

722

723 **Figure S1: Mapping and cloning of X9.** (A) Image of the X chromosome with the position of  
724 the mapped lethal mutations and mapped region by the closest breakpoints (distal  
725 Df(1)ED6829, proximal Dp(1;3)DC156). The distal lethality was mapped by complementation  
726 with indicated duplication and deficiency chromosomes. Dashed regions indicate uncertainty of  
727 the breakpoints. Complementing duplications and non-complementing deficiencies are marked  
728 in red. (B) Sequence traces of DNA amplified from heterozygous *PpV*[X9]/FM7 and in  
729 comparison X238/FM7 with a related genetic background. The double peak in the X9 trace  
730 reveals a non-sense mutation in codon 7 (TGG -> TAG).

731

732 **Figure S2: Alignment of Twine and Cdc25 homologue sequences** (mus-mouse, frog-  
733 *Xenopus la.*, hu-human). Phosphorylation sites are marked in color. Conserved residues are  
734 printed in bold.

735

736 **Table S1: Comparison of non-phospho peptides in MS analysis of wild type and X9**  
737 **mutant.** The average peak area of five peptides were determined by XIC (extracted ion  
738 chromatograms) and compared between the wild type (wt) and the *PpV*[X9] mutant samples.  
739 The AA ratio of wt/X9 averages at 1.78 indicating that non-phosphopeptides were consistently  
740 about 1.8-fold more abundant in the wild type compared to *PpV*[X9] mutant samples.

| Peptide                | mass     | AA (wt)  | AA ( <i>PpV</i> ) | AA ratio (wt/ <i>PpV</i> ) |
|------------------------|----------|----------|-------------------|----------------------------|
| ALGDEPELIGDLSK         | 728.8799 | 18358242 | 8486655           | 2.16                       |
| LIQGEFDEQLGSQGGYEIIDCR | 843.0633 | 2797579  | 1879327           | 1.49                       |
| YPYEFLGGHIR            | 676.3420 | 40374669 | 22168420          | 1.82                       |
| IYVFHCFSSER            | 787.3584 | 8807155  | 5181341           | 1.7                        |
| GQIQEAFPTLTSNQENR      | 966.9741 | 44055348 | 25160476          | 1.75                       |

741

742

743

744

745

746

747 **Movie 1:** Movie of wild type embryo and embryo from *PpV[X9]* germ line clones expressing  
748 Histone2Av-RFP.

749

750 **Movie 2:** Movie of embryo from *PpV[X9]* germ line clones expressing Histone2Av-RFP during  
751 mitosis.

**Figure 1****A**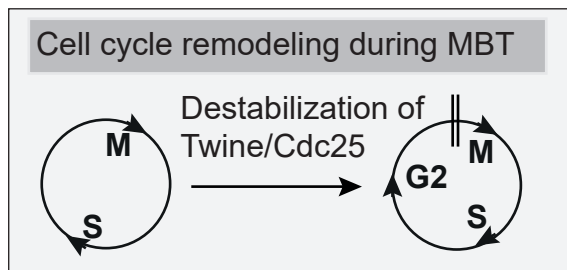**B**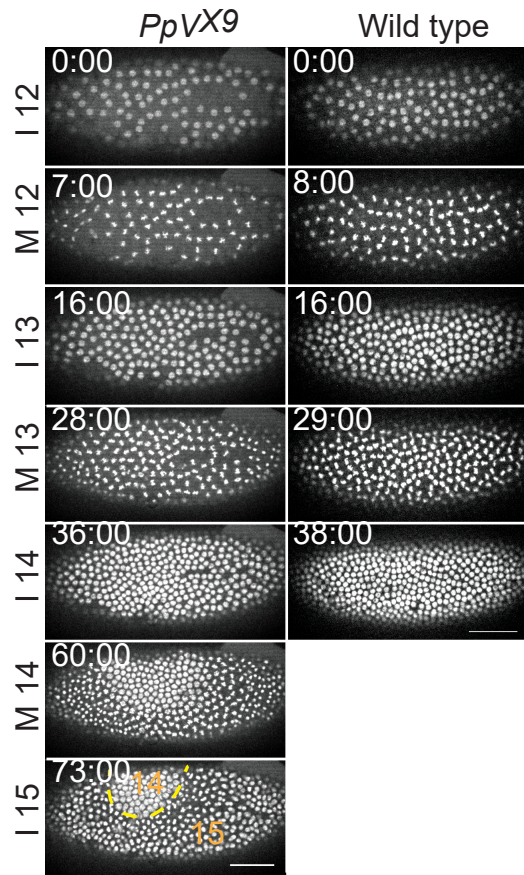**C**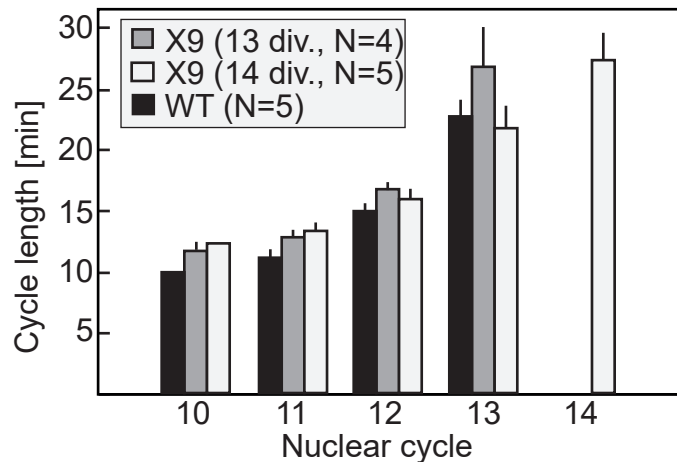

**Figure 2**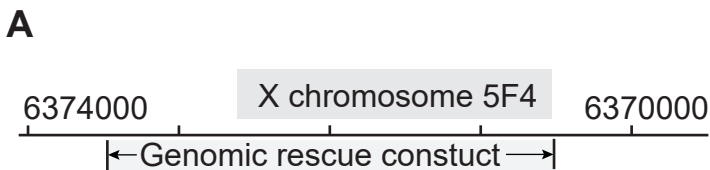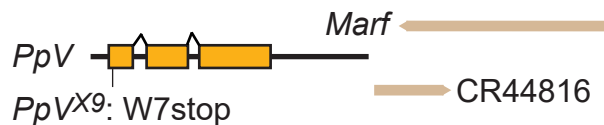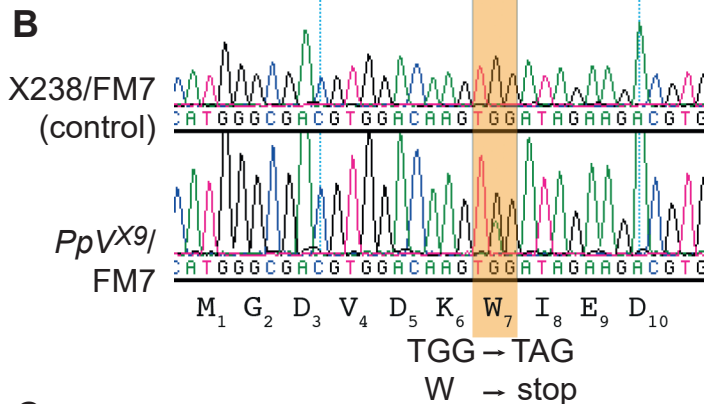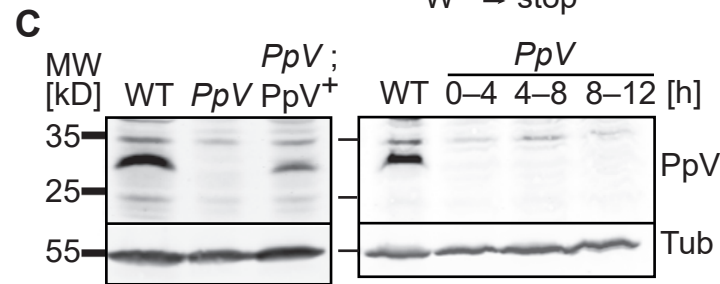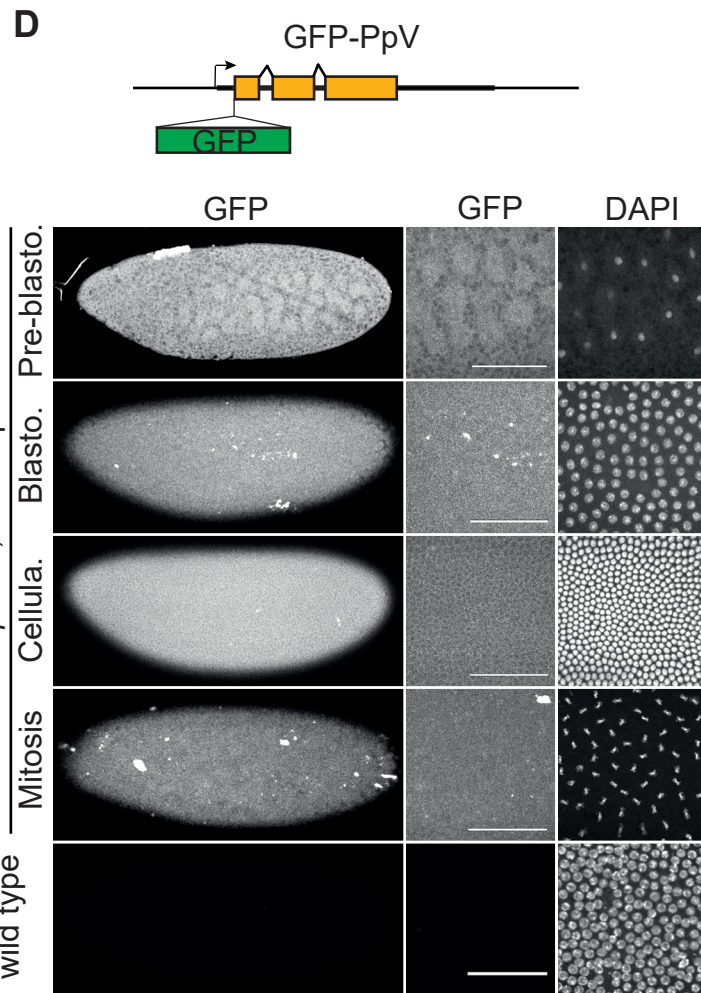

# Figure 3

wild type

*PpV*<sup>X9</sup>

Twine

Twine DNA Slam

NC13

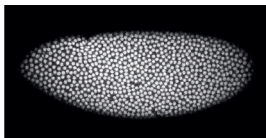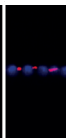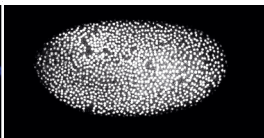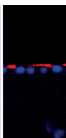

NC14

early

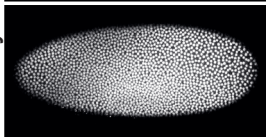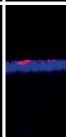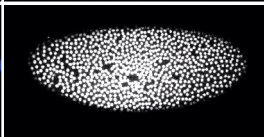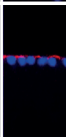

late

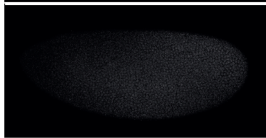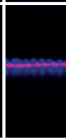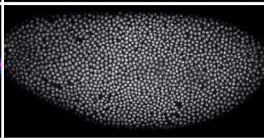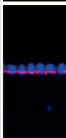

**Figure 4**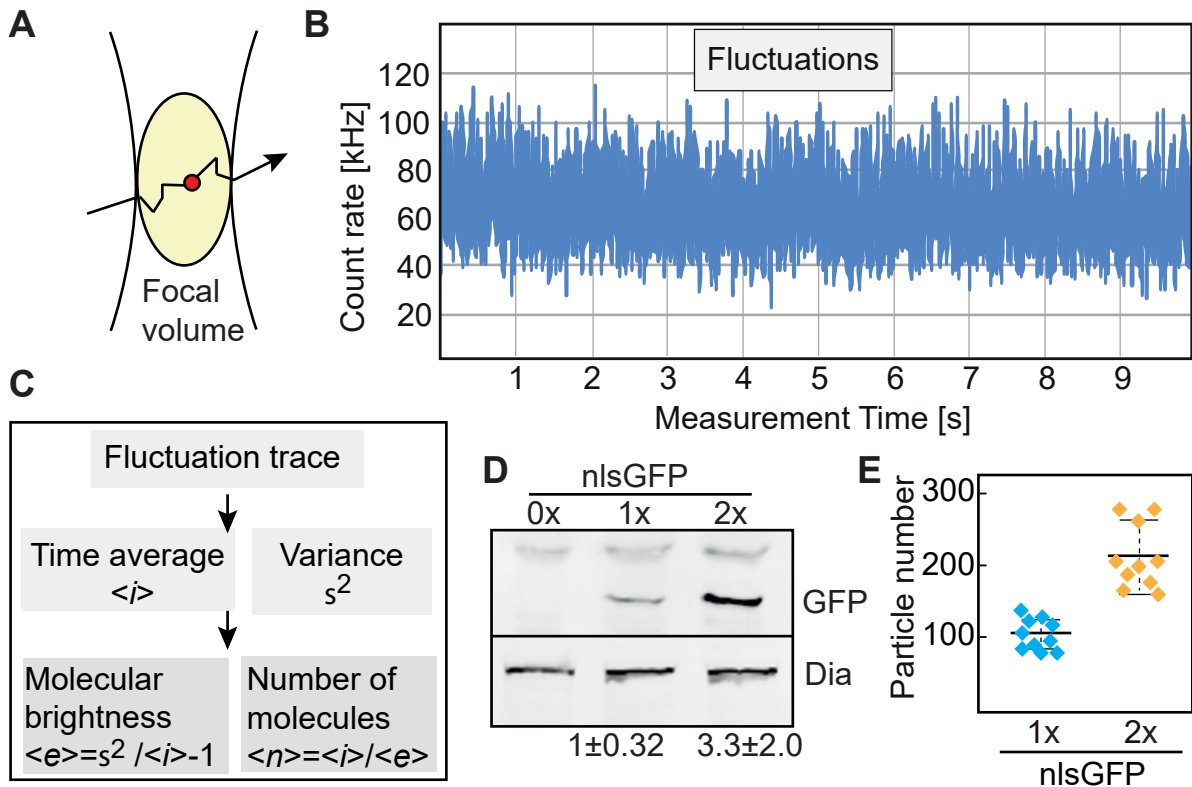



**Figure 5**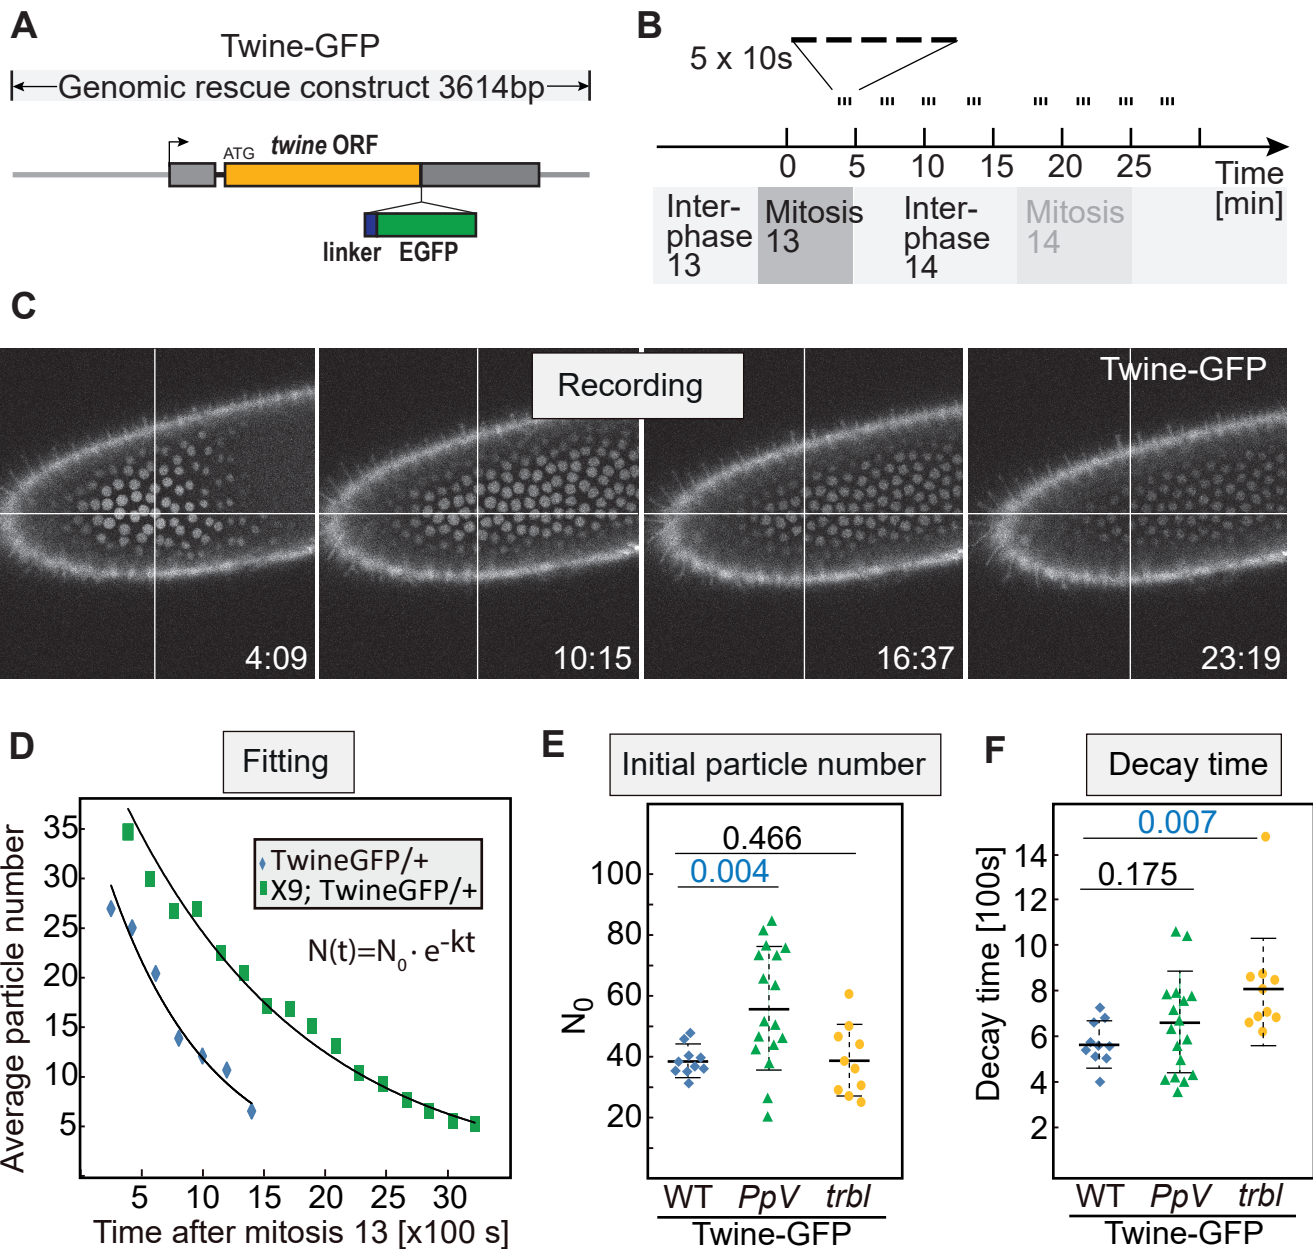

**Figure 6**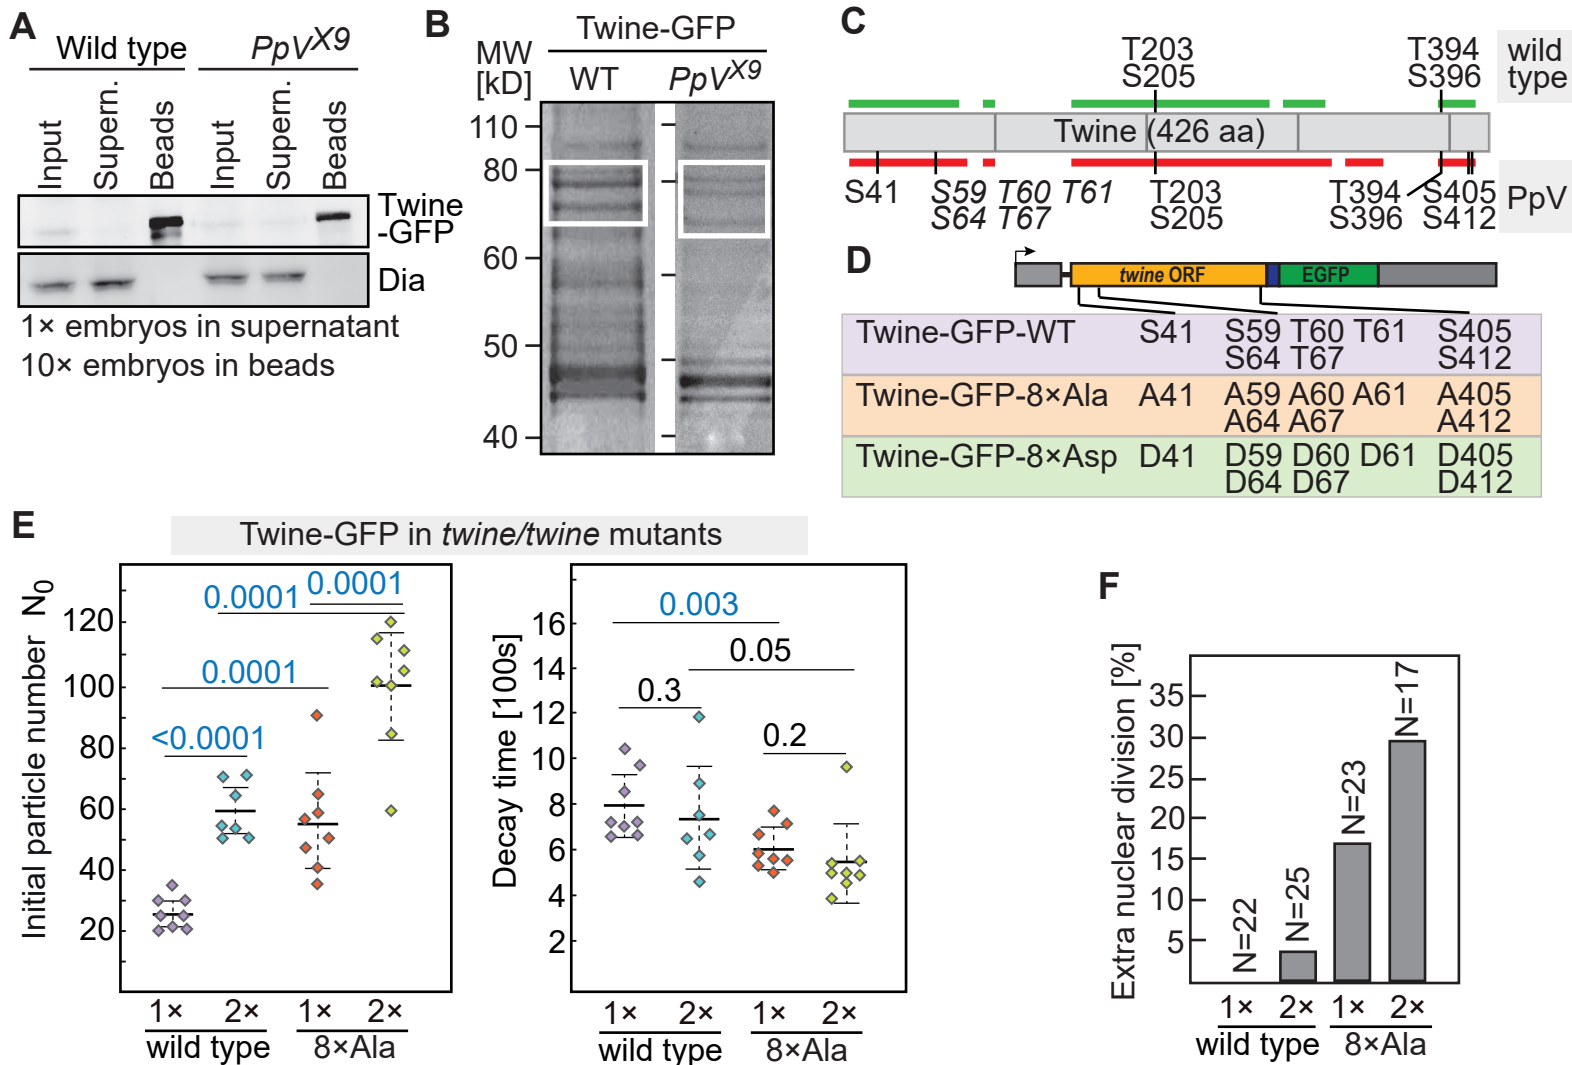

**Figure 7**

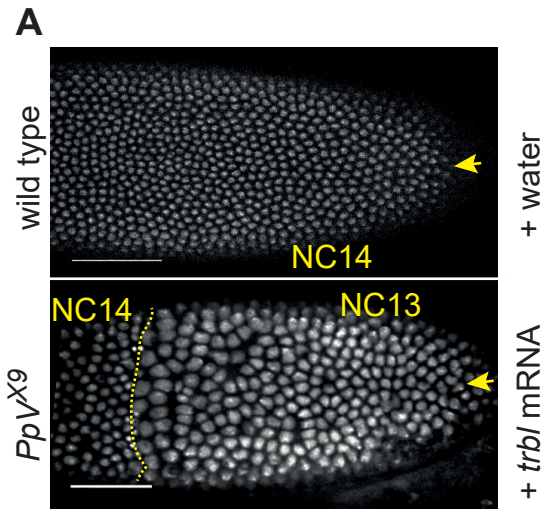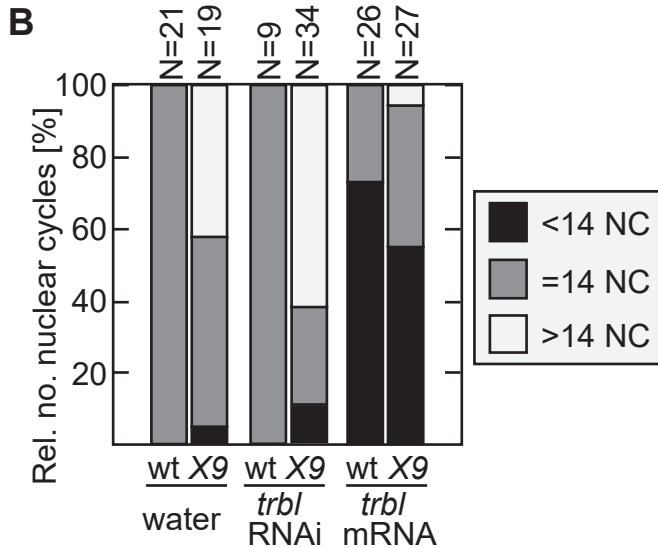

**Figure 8**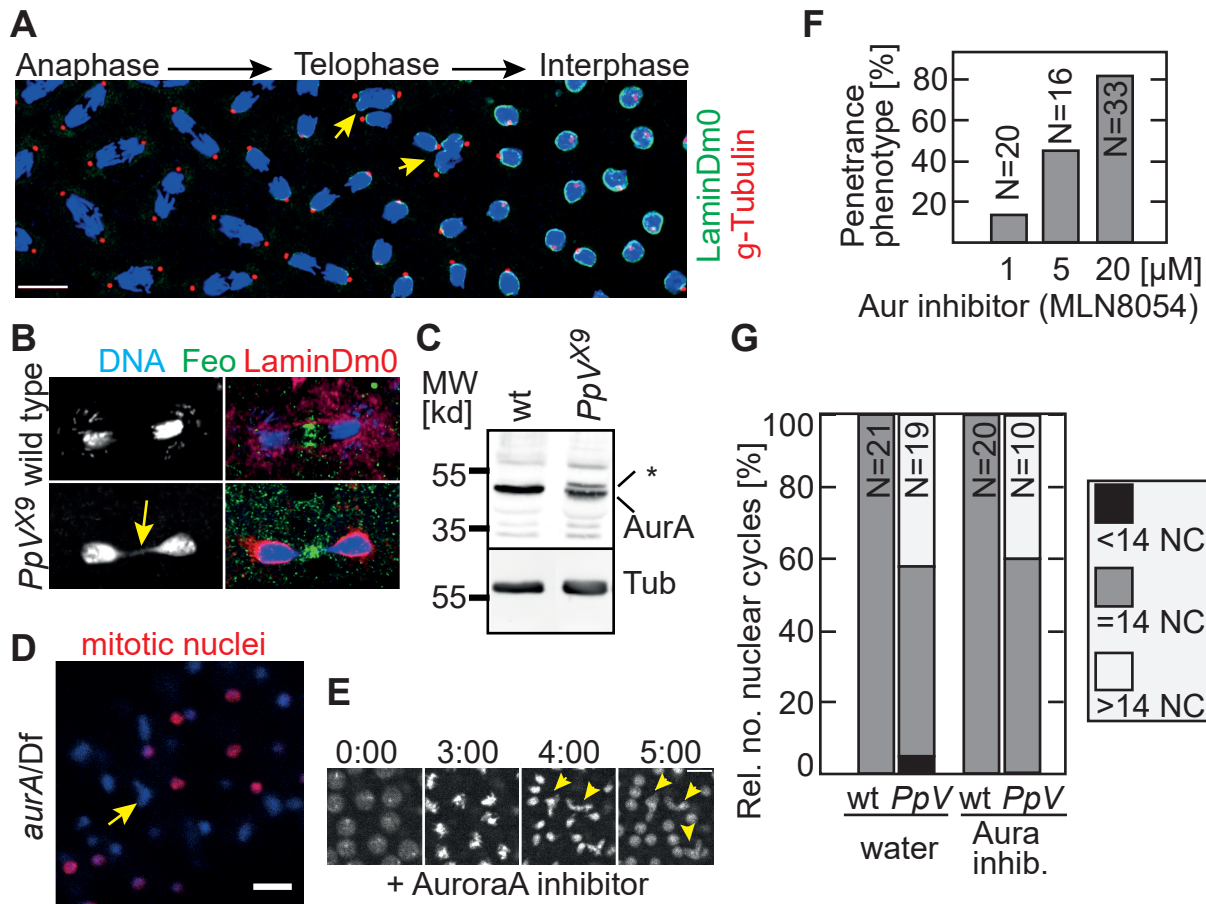

**Figure 9****A**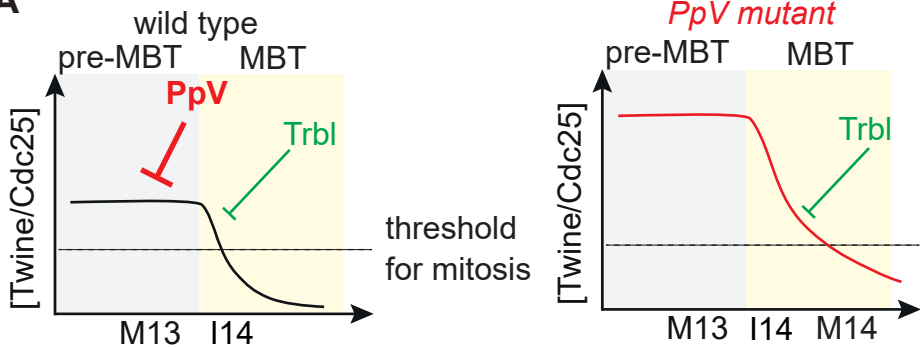**B**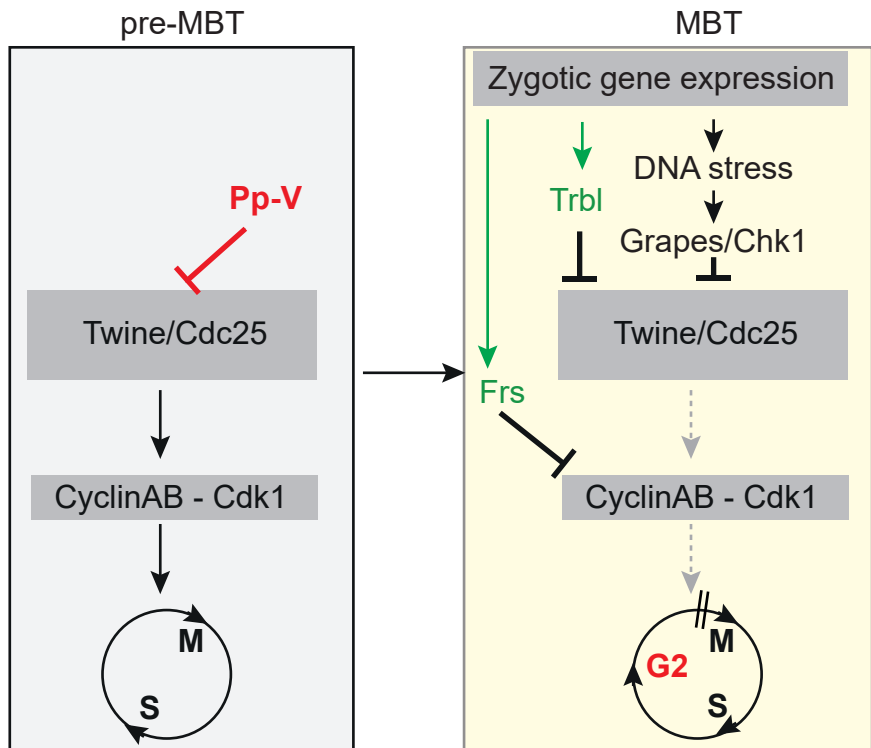

Supplemental data Figure S1

A

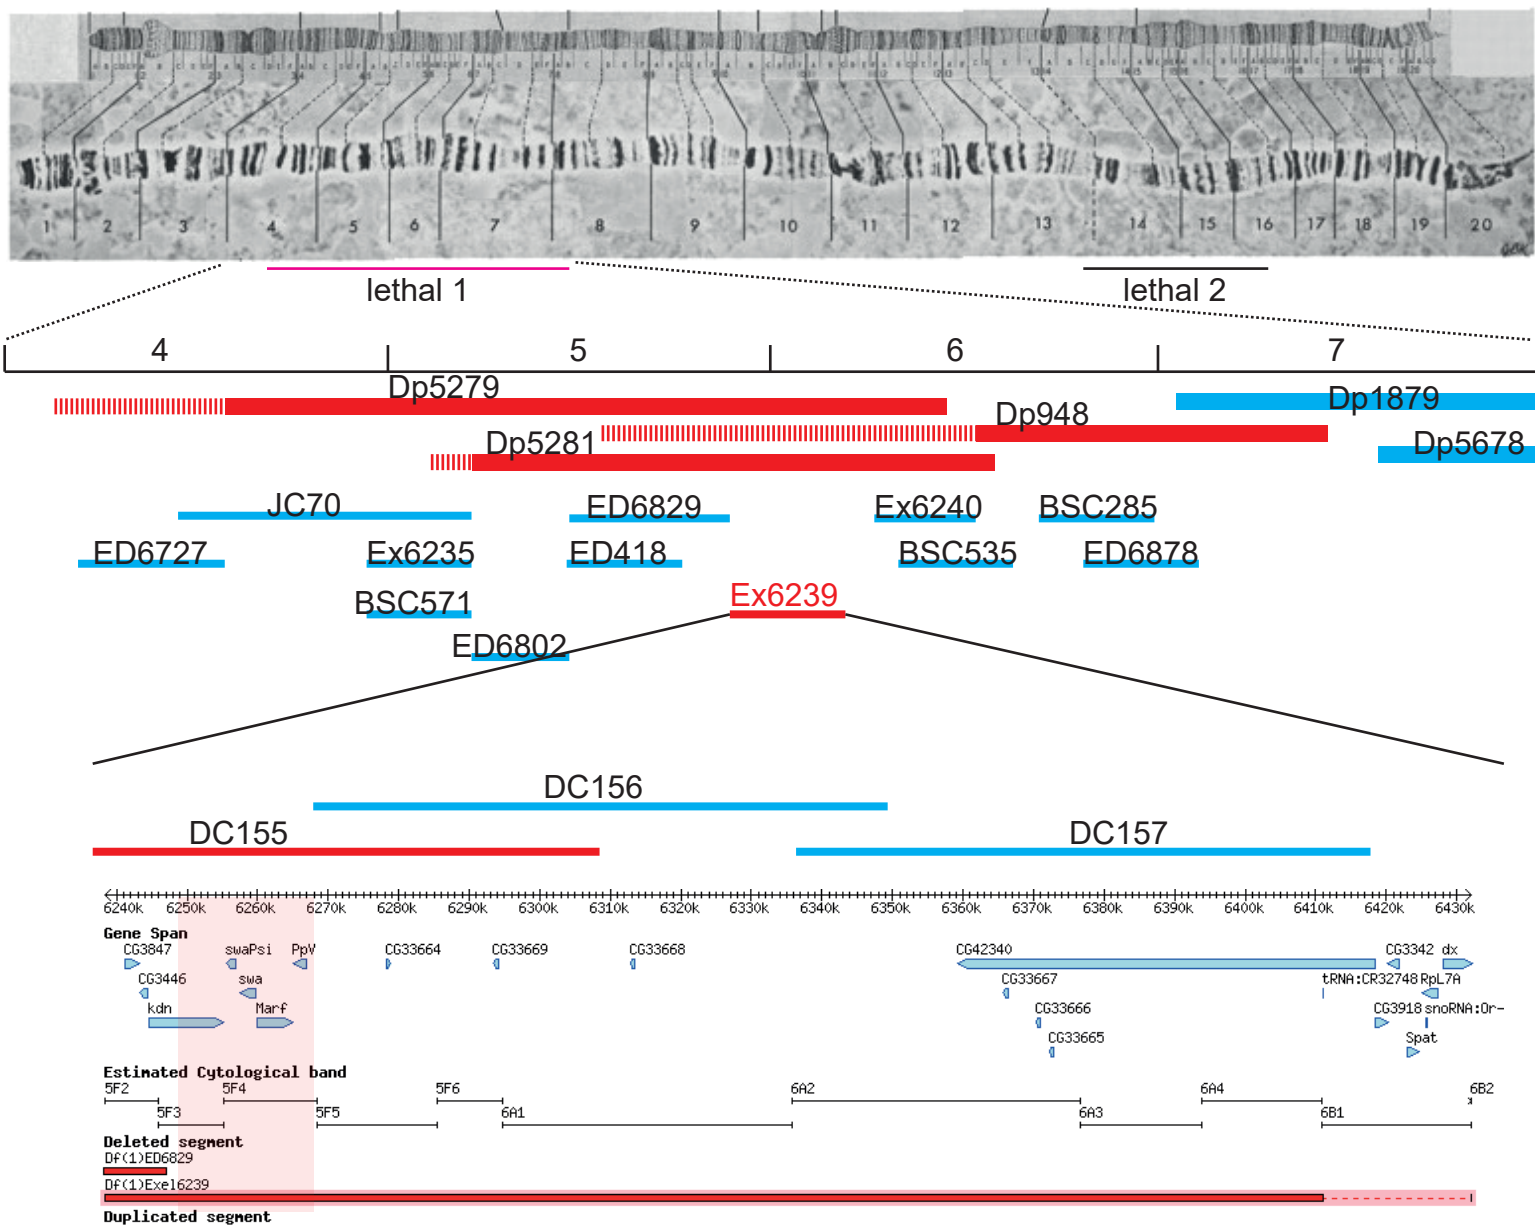

## Supplemental data Figure S2

|             |                                                                                        |       |     |     |      |
|-------------|----------------------------------------------------------------------------------------|-------|-----|-----|------|
|             | 40                                                                                     | 50    | 60  | 70  | .... |
| Twine       | ...AKRRK <b>S</b> AVQETPLQWMLKRHIPA <b>STTVLS</b> PI <b>T</b> ELSON.                   |       |     |     |      |
| Cdc25C mus  | ...SANLSILSGGTPKCCLDLSNLSSGEMSA <b>S</b> PL <b>T</b> TSADL.                            |       |     |     |      |
| Cdc25C frog | ...FSNL <b>S</b> TFSGETPKRCLDLSNL--GDETAPLP <b>T</b> ESPDR.                            |       |     |     |      |
| Cdc25C hu.  | ...SANLSILSGGTPKRCLDLSNLSSGEITATQL <b>T</b> TSADL.                                     |       |     |     |      |
| ....        | 200                                                                                    | ..... | 400 | 410 |      |
| Twine       | ..KKMQRK <b>T</b> LSMND...RAK <b>T</b> KS <b>W</b> QCGEGGD <b>S</b> GIGGGG <b>S</b> R. |       |     |     |      |
| Cdc25C mus  | ..GLSLRKMVPLCD...RSQ <b>S</b> K-----AQEGER.                                            |       |     |     |      |
| Cdc25C frog | ..GTSLKK <b>T</b> LSLCD...RTKCK-----TSVGDR.                                            |       |     |     |      |
| Cdc25C hu.  | ..GLCLKK <b>T</b> VS <b>L</b> CD...RSQ <b>S</b> K-----VQEGER.                          |       |     |     |      |

|           |                                                            |
|-----------|------------------------------------------------------------|
| <b>ST</b> | Phosphorylated in wild type and <i>PpV</i> mutants         |
| <b>ST</b> | Phosphorylated in <i>PpV</i> mutants                       |
| <b>ST</b> | ONE of these sites is phosphorylated in <i>PpV</i> mutants |
